# Supplementary material
Source: publisher site journal article supplement (https://static.cambridge.org/content/id/urn:cambridge.org:id:article:S0143814X20000045/resource/name/S0143814X20000045supp001.pdf)
Supplement: Supplementary file 1 [file S0143814X20000045supp001.pdf]

# Supplementary Materials

December 1, 2019

## Contents

|                                                                          |               |
|--------------------------------------------------------------------------|---------------|
| <b>A1 RGGVY Targeting: Additional Material</b>                           | <b>APP-2</b>  |
| A1.1 Control Variables and Split Samples . . . . .                       | APP-2         |
| A1.2 Summary Statistics . . . . .                                        | APP-3         |
| <b>A2 Pre-RGGVY Rural Electrification</b>                                | <b>APP-9</b>  |
| <b>A3 Regression Discontinuity: Identifying Assumptions</b>              | <b>APP-13</b> |
| <b>A4 Regression Discontinuity: Summary Statistics</b>                   | <b>APP-13</b> |
| <b>A5 Regression Discontinuity: Balance Statistics and Density Tests</b> | <b>APP-18</b> |
| <b>A6 Regression Discontinuity: Additional Analysis</b>                  | <b>APP-23</b> |
| <b>A7 Regression Discontinuity: Conditioning on Reservation Status</b>   | <b>APP-34</b> |
| <b>A8 Regional Samples</b>                                               | <b>APP-38</b> |
| <b>A9 Additional Results</b>                                             | <b>APP-43</b> |
| <b>A10 ACCESS Survey</b>                                                 | <b>APP-59</b> |
| A10.1 Summary Statistics . . . . .                                       | APP-59        |
| A10.2 Evidence from Household Surveys . . . . .                          | APP-59        |

## A1 RGGVY Targeting: Additional Material

### A1.1 Control Variables and Split Samples

Because SC population percentages could be correlated with confounding variables, we control for a select set of variables that could influence both the SC population percentage and the probability of RGGVY implementation. For each control variable, we also explain why it is not a “bad control” in that it would be influenced by SC population (e.g., Angrist and Pischke, 2009). For summary statistics, see Table A2.

We begin with the logarithmized distance between the village and the closest town. Because all towns in Uttar Pradesh are now electrified, the cost and ease of implementing rural electrification works in nearby villages is much lower than the cost of such works in faraway villages. At the same time, the social bias against Dalits in Uttar Pradesh may mean that they tend to live farther away from towns.

Next, we control for earlier village-level electrification status, as per the 2001 Census of India (unfortunately, this earlier census does not contain household electrification percentages by village). Obviously, the status of village electrification in 2001 is a strong predictor for the need for RGGVY. At the same time, the geographic distribution of village electrification turns out to be related to SC percentage in the village population (see below for details).

We also control for the logarithmized population of the village. Larger villages tend to have higher electrification rates to begin with, so they may not need the RGGVY. At the same time, larger villages tend to have more diverse populations, and thus their SC shares are much less likely to be zero than those of smaller villages.

Because RGGVY implementation requires infrastructure, we also control for the presence of a paved road. Given that Dalits historically tend to live in more remote and poorly connected villages, the presence of a paved road is also correlated with the SC population.

We include electoral constituency fixed effects in some models. These fixed effects allow us to compare villages close to each other and sharing similar political histories. It also helps us rule out competing explanations for our findings, such as those based on Uttar Pradesh’s location with

| Variable                    | Description                                                                     | Source                                     |
|-----------------------------|---------------------------------------------------------------------------------|--------------------------------------------|
| RGGVY                       | Implementation of RGGVY (= 1) between April 2005 and Oct. 2014                  | Rural Electrification Corporation of India |
| Electricity                 | Percentage of households with grid electricity access as of 2011 (and 2001)     | Census 2011                                |
| Domestic Electricity (2001) | Village is electrified as of 2001 (= 1)                                         | Census 2001                                |
| Share SC                    | Share of a village's population who belongs to SC (or ST) as of 2011 (and 2001) | Census 2011 (and 2001)                     |
| Pucca Road                  | Indicator denoting the presence of a pucca road (= 1)                           | Census 2011                                |
| Distance (log)              | Log distance between the village and the closest towns                          | Census 2011                                |
| Population (log)            | Log population of the village                                                   | Census 2011                                |
| Literacy Rate (%)           | Village literacy rate (%)                                                       | Census 2001                                |
| # Coop Commercial Banks     | Number of cooperative banks                                                     | Census 2001                                |
| Irrigated Land (log)        | Log area of irrigated land                                                      | Census 2001                                |
| Mean Light                  | Average nighttime luminosity, 1995-2004                                         | NOAA satellite data                        |
| BSP Win                     | BSP won this constituency (= 1)                                                 | Election Commission of India               |
| BSP Margin                  | Margin of victory/loss for BSP (= 1)                                            | Election Commission of India               |
| Caste background of MLA     | Whether an MLA is SC or not                                                     | Authors' own data                          |

Table A1: Data sources.

respect to national electricity sources.

## A1.2 Summary Statistics

- Table A2 shows the summary statistics for the full sample at the village level.
- Tables A3 and A3 show the summary statistics for the full sample by districts for the presence of SCs.
- Tables A5 and A5 show the summary statistics for the full sample by districts for the implementation of RGGVY.

|                              | Summary Statistic |       |      |     |       |
|------------------------------|-------------------|-------|------|-----|-------|
|                              | Mean              | S.D.  | Min. | Max | Obs.  |
| RGGVY                        | 31.08             | 46.28 | 0    | 100 | 96557 |
| Domestic Electricity (2001)  | 35.84             | 47.95 | 0    | 100 | 96557 |
| Lighting Source: Electricity | 23.41             | 24.02 | 0    | 100 | 96557 |
| Share SC (%)                 | 24.57             | 20.70 | 0    | 100 | 96557 |
| BSP Margin                   | -0.83             | 8.62  | -49  | 22  | 52833 |
| BSP Win                      | 0.26              | 0.44  | 0    | 1   | 96557 |
| Population (log)             | 6.91              | 1.10  | 1    | 11  | 96557 |
| Distance (log)               | 2.43              | 1.10  | 0    | 5   | 90683 |
| Pucca Road                   | 0.66              | 0.47  | 0    | 1   | 96196 |
| Lack of Asset                | 10.94             | 10.24 | 0    | 100 | 96557 |
| Literacy Rate (%)            | 55.75             | 11.19 | 0    | 100 | 96557 |

Table A2: Summary statistics for the entire sample. The unit of analysis is a village.

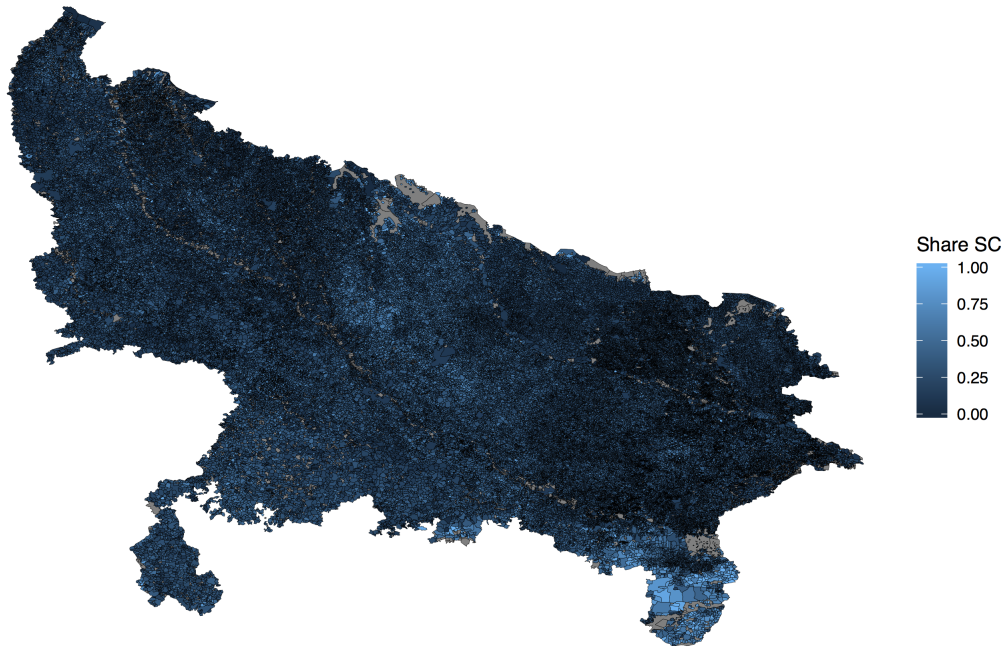

Figure A1: Geographic distribution of SC share by village.

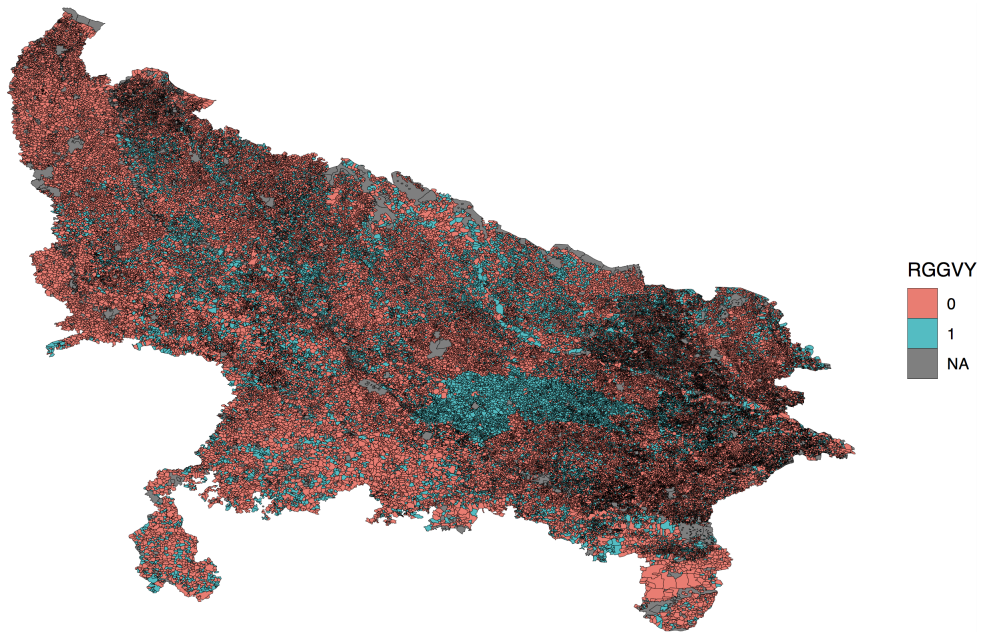

Figure A2: Geographic distribution of RGGVY implementation at the village level.

Summary Statistic: SC/ST by District (part A)

|                     | mean                  | p25  | p50  | p75  | min | max   |
|---------------------|-----------------------|------|------|------|-----|-------|
| Agra                | 21.6                  | 9.0  | 19.0 | 30.4 | 0.0 | 98.7  |
| Aligarh             | 23.8                  | 11.4 | 21.1 | 32.5 | 0.0 | 100.0 |
| Allahabad           | 25.3                  | 12.1 | 23.0 | 34.6 | 0.0 | 100.0 |
| Ambedkar Nagar      | 28.4                  | 16.2 | 26.8 | 38.1 | 0.0 | 100.0 |
| Auraiya             | 30.7                  | 15.7 | 28.0 | 42.5 | 0.0 | 100.0 |
| Azamgarh            | 27.5                  | 7.2  | 23.2 | 39.6 | 0.0 | 100.0 |
| Baghpat             | 13.1                  | 6.4  | 11.7 | 16.9 | 0.0 | 73.3  |
| Bahraich            | 16.4                  | 6.9  | 12.9 | 22.3 | 0.0 | 97.2  |
| Ballia              | 18.4                  | 0.9  | 14.0 | 27.0 | 0.0 | 100.0 |
| Balrampur           | 16.2                  | 7.7  | 13.2 | 20.3 | 0.0 | 100.0 |
| Banda               | 22.2                  | 11.3 | 20.3 | 31.2 | 0.0 | 99.3  |
| Barabanki           | 30.6                  | 17.4 | 28.9 | 41.2 | 0.0 | 100.0 |
| Bareilly            | 16.3                  | 3.0  | 11.6 | 23.3 | 0.0 | 100.0 |
| Basti               | 21.8                  | 8.5  | 19.5 | 30.8 | 0.0 | 100.0 |
| Bijnor              | 26.6                  | 2.9  | 22.2 | 41.9 | 0.0 | 100.0 |
| Budaun              | 18.3                  | 3.0  | 13.2 | 26.2 | 0.0 | 100.0 |
| Bulandshahar        | 23.6                  | 9.8  | 20.4 | 33.1 | 0.0 | 100.0 |
| Chandauli           | 28.0                  | 6.9  | 23.9 | 40.3 | 0.0 | 100.0 |
| Chitrakoot          | 28.6                  | 14.0 | 25.3 | 37.1 | 0.0 | 100.0 |
| Deoria              | 20.4                  | 8.4  | 17.7 | 27.5 | 0.0 | 100.0 |
| Etah                | 17.9                  | 3.8  | 13.5 | 26.0 | 0.0 | 100.0 |
| Etawah              | 26.5                  | 11.6 | 23.1 | 38.0 | 0.0 | 100.0 |
| Faizabad            | 24.5                  | 14.7 | 22.8 | 32.1 | 0.0 | 99.9  |
| Farrukhabad         | 17.1                  | 5.2  | 13.1 | 24.2 | 0.0 | 100.0 |
| Fatehpur            | 27.3                  | 15.6 | 25.8 | 37.1 | 0.0 | 100.0 |
| Firozabad           | 19.7                  | 4.3  | 15.9 | 28.5 | 0.0 | 100.0 |
| Gautam Buddha Nagar | 20.2                  | 8.0  | 17.6 | 26.9 | 0.0 | 95.4  |
| Ghaziabad           | 21.1                  | 8.0  | 18.0 | 30.2 | 0.0 | 100.0 |
| Ghazipur            | 22.4                  | 0.0  | 16.8 | 33.4 | 0.0 | 100.0 |
| Gonda               | 17.5                  | 8.4  | 15.2 | 23.3 | 0.0 | 100.0 |
| Gorakhpur           | 25.4                  | 8.0  | 21.0 | 35.9 | 0.0 | 100.0 |
| Hamirpur            | 22.4                  | 13.5 | 22.1 | 30.0 | 0.0 | 100.0 |
| Hardoi              | 33.0 <sub>APP-5</sub> | 14.7 | 29.6 | 47.9 | 0.0 | 100.0 |
| Hathras             | 27.6                  | 12.7 | 24.4 | 37.2 | 0.0 | 100.0 |

Table A3: Summary statistics on the presence of SC, by district.

Summary Statistic: SC/ST by District (part B)

|                            | mean   | p25  | p50  | p75  | min | max   |
|----------------------------|--------|------|------|------|-----|-------|
| Jalaun                     | 29.2   | 15.3 | 28.1 | 39.6 | 0.0 | 100.0 |
| Jaunpur                    | 23.6   | 6.7  | 20.4 | 33.6 | 0.0 | 100.0 |
| Jhansi                     | 31.8   | 21.7 | 31.6 | 41.3 | 0.0 | 100.0 |
| Jyotiba Phule Nagar        | 18.9   | 1.3  | 12.4 | 29.1 | 0.0 | 100.0 |
| Kannauj                    | 21.0   | 9.9  | 18.0 | 28.2 | 0.0 | 100.0 |
| Kanpur Dehat               | 26.6   | 13.7 | 25.4 | 36.8 | 0.0 | 100.0 |
| Kanpur Nagar               | 28.8   | 16.4 | 26.9 | 38.5 | 0.0 | 100.0 |
| Kaushambi                  | 36.8   | 24.2 | 35.8 | 48.3 | 0.0 | 100.0 |
| Kheri                      | 33.4   | 16.8 | 29.6 | 44.3 | 0.0 | 100.0 |
| Kushinagar                 | 18.6   | 9.2  | 16.2 | 25.3 | 0.0 | 100.0 |
| Lalitpur                   | 27.2   | 16.9 | 26.3 | 36.0 | 0.0 | 100.0 |
| Lucknow                    | 41.3   | 27.7 | 40.3 | 53.3 | 0.0 | 100.0 |
| Mahoba                     | 27.1   | 18.0 | 25.8 | 35.1 | 0.0 | 100.0 |
| Mahrajganj                 | 20.1   | 10.9 | 18.3 | 26.8 | 0.0 | 96.5  |
| Mainpuri                   | 20.4   | 6.7  | 17.4 | 28.2 | 0.0 | 100.0 |
| Mathura                    | 21.1   | 9.9  | 17.9 | 28.7 | 0.0 | 100.0 |
| Mau                        | 26.8   | 2.5  | 20.6 | 40.3 | 0.0 | 100.0 |
| Meerut                     | 22.4   | 7.9  | 19.9 | 32.4 | 0.0 | 100.0 |
| Mirzapur                   | 29.4   | 9.1  | 25.3 | 45.7 | 0.0 | 100.0 |
| Moradabad                  | 19.7   | 2.6  | 13.8 | 29.5 | 0.0 | 100.0 |
| Muzaffarnagar              | 18.5   | 6.1  | 14.5 | 24.7 | 0.0 | 100.0 |
| Pilibhit                   | 17.0   | 2.4  | 12.8 | 23.8 | 0.0 | 100.0 |
| Pratapgarh                 | 22.7   | 12.4 | 21.2 | 30.7 | 0.0 | 100.0 |
| Rae Bareli                 | 33.0   | 22.2 | 31.7 | 42.8 | 0.0 | 100.0 |
| Rampur                     | 16.6   | 1.2  | 8.6  | 25.3 | 0.0 | 100.0 |
| Saharanpur                 | 28.2   | 10.1 | 25.4 | 40.4 | 0.0 | 100.0 |
| Sant Kabir Nagar           | 23.2   | 8.4  | 19.5 | 32.4 | 0.0 | 100.0 |
| Sant Ravidas Nagar Bhadohi | 22.7   | 3.5  | 19.2 | 33.1 | 0.0 | 100.0 |
| Shahjahanpur               | 20.4   | 4.4  | 14.3 | 28.7 | 0.0 | 100.0 |
| Shrawasti                  | 19.6   | 10.7 | 17.1 | 25.3 | 0.0 | 99.4  |
| Siddharthnagar             | 17.8   | 6.5  | 14.7 | 25.0 | 0.0 | 100.0 |
| Sitapur                    | 37.8   | 23.1 | 36.3 | 50.1 | 0.0 | 100.0 |
| Sonbhadra                  | 43.7   | 22.0 | 40.8 | 64.2 | 0.0 | 100.0 |
| Sultanpur                  | 23.8   | 13.1 | 22.0 | 31.8 | 0.0 | 100.0 |
| Unnao                      | 36.0   | 22.3 | 33.7 | 47.4 | 0.0 | 100.0 |
| Varanasi                   | 18.8-6 | 3.6  | 14.9 | 27.4 | 0.0 | 100.0 |
| Total                      | 24.6   | 9.0  | 21.0 | 34.9 | 0.0 | 100.0 |

Table A4: Summary statistics on the presence of SC, by district.

**Summary Statistic: RGGVY by District (Part A)**

|                     | Mean | 25th pctl | 50th pctl | 75th pctl | Min | Max   |
|---------------------|------|-----------|-----------|-----------|-----|-------|
| Agra                | 15.6 | 0.0       | 0.0       | 0.0       | 0.0 | 100.0 |
| Aligarh             | 28.7 | 0.0       | 0.0       | 100.0     | 0.0 | 100.0 |
| Allahabad           | 35.3 | 0.0       | 0.0       | 100.0     | 0.0 | 100.0 |
| Ambedkar Nagar      | 6.8  | 0.0       | 0.0       | 0.0       | 0.0 | 100.0 |
| Auraiya             | 37.9 | 0.0       | 0.0       | 100.0     | 0.0 | 100.0 |
| Azamgarh            | 49.0 | 0.0       | 0.0       | 100.0     | 0.0 | 100.0 |
| Baghpat             | 0.0  | 0.0       | 0.0       | 0.0       | 0.0 | 0.0   |
| Bahraich            | 46.6 | 0.0       | 0.0       | 100.0     | 0.0 | 100.0 |
| Ballia              | 27.3 | 0.0       | 0.0       | 100.0     | 0.0 | 100.0 |
| Balrampur           | 24.1 | 0.0       | 0.0       | 0.0       | 0.0 | 100.0 |
| Banda               | 22.6 | 0.0       | 0.0       | 0.0       | 0.0 | 100.0 |
| Barabanki           | 27.8 | 0.0       | 0.0       | 100.0     | 0.0 | 100.0 |
| Bareilly            | 25.6 | 0.0       | 0.0       | 100.0     | 0.0 | 100.0 |
| Basti               | 36.0 | 0.0       | 0.0       | 100.0     | 0.0 | 100.0 |
| Bijnor              | 13.9 | 0.0       | 0.0       | 0.0       | 0.0 | 100.0 |
| Budaun              | 30.8 | 0.0       | 0.0       | 100.0     | 0.0 | 100.0 |
| Bulandshahar        | 18.4 | 0.0       | 0.0       | 0.0       | 0.0 | 100.0 |
| Chandauli           | 20.5 | 0.0       | 0.0       | 0.0       | 0.0 | 100.0 |
| Chitrakoot          | 34.7 | 0.0       | 0.0       | 100.0     | 0.0 | 100.0 |
| Deoria              | 12.1 | 0.0       | 0.0       | 0.0       | 0.0 | 100.0 |
| Etah                | 48.7 | 0.0       | 0.0       | 100.0     | 0.0 | 100.0 |
| Etawah              | 29.6 | 0.0       | 0.0       | 100.0     | 0.0 | 100.0 |
| Faizabad            | 34.4 | 0.0       | 0.0       | 100.0     | 0.0 | 100.0 |
| Farrukhabad         | 35.7 | 0.0       | 0.0       | 100.0     | 0.0 | 100.0 |
| Fatehpur            | 33.8 | 0.0       | 0.0       | 100.0     | 0.0 | 100.0 |
| Firozabad           | 33.7 | 0.0       | 0.0       | 100.0     | 0.0 | 100.0 |
| Gautam Buddha Nagar | 16.3 | 0.0       | 0.0       | 0.0       | 0.0 | 100.0 |
| Ghaziabad           | 1.4  | 0.0       | 0.0       | 0.0       | 0.0 | 100.0 |
| Ghazipur            | 9.4  | 0.0       | 0.0       | 0.0       | 0.0 | 100.0 |
| Gonda               | 53.0 | 0.0       | 100.0     | 100.0     | 0.0 | 100.0 |
| Gorakhpur           | 18.3 | 0.0       | 0.0       | 0.0       | 0.0 | 100.0 |
| Hamirpur            | 28.0 | 0.0       | 0.0       | 100.0     | 0.0 | 100.0 |
| Hardoi              | 40.7 | 0.0       | 0.0       | 100.0     | 0.0 | 100.0 |
| Hathras             | 17.4 | 0.0       | 0.0       | 0.0       | 0.0 | 100.0 |

Table A5: Summary statistics on the implementation of RGGVY, by district.

**Summary Statistic: RGGVY by District (Part B)**

|                            | Mean | 25th pctl | 50th pctl | 75th pctl | Min | Max   |
|----------------------------|------|-----------|-----------|-----------|-----|-------|
| Jalaun                     | 11.4 | 0.0       | 0.0       | 0.0       | 0.0 | 100.0 |
| Jaunpur                    | 21.1 | 0.0       | 0.0       | 0.0       | 0.0 | 100.0 |
| Jhansi                     | 24.5 | 0.0       | 0.0       | 0.0       | 0.0 | 100.0 |
| Jyotiba Phule Nagar        | 53.5 | 0.0       | 100.0     | 100.0     | 0.0 | 100.0 |
| Kannauj                    | 35.6 | 0.0       | 0.0       | 100.0     | 0.0 | 100.0 |
| Kanpur Dehat               | 34.6 | 0.0       | 0.0       | 100.0     | 0.0 | 100.0 |
| Kanpur Nagar               | 17.4 | 0.0       | 0.0       | 0.0       | 0.0 | 100.0 |
| Kaushambi                  | 25.6 | 0.0       | 0.0       | 100.0     | 0.0 | 100.0 |
| Kheri                      | 36.9 | 0.0       | 0.0       | 100.0     | 0.0 | 100.0 |
| Kushinagar                 | 28.0 | 0.0       | 0.0       | 100.0     | 0.0 | 100.0 |
| Lalitpur                   | 37.3 | 0.0       | 0.0       | 100.0     | 0.0 | 100.0 |
| Lucknow                    | 4.0  | 0.0       | 0.0       | 0.0       | 0.0 | 100.0 |
| Mahoba                     | 42.3 | 0.0       | 0.0       | 100.0     | 0.0 | 100.0 |
| Mahrajganj                 | 24.6 | 0.0       | 0.0       | 0.0       | 0.0 | 100.0 |
| Mainpuri                   | 33.8 | 0.0       | 0.0       | 100.0     | 0.0 | 100.0 |
| Mathura                    | 4.1  | 0.0       | 0.0       | 0.0       | 0.0 | 100.0 |
| Mau                        | 45.1 | 0.0       | 0.0       | 100.0     | 0.0 | 100.0 |
| Meerut                     | 0.0  | 0.0       | 0.0       | 0.0       | 0.0 | 0.0   |
| Mirzapur                   | 32.3 | 0.0       | 0.0       | 100.0     | 0.0 | 100.0 |
| Moradabad                  | 20.7 | 0.0       | 0.0       | 0.0       | 0.0 | 100.0 |
| Muzaffarnagar              | 0.0  | 0.0       | 0.0       | 0.0       | 0.0 | 0.0   |
| Pilibhit                   | 34.2 | 0.0       | 0.0       | 100.0     | 0.0 | 100.0 |
| Pratapgarh                 | 19.4 | 0.0       | 0.0       | 0.0       | 0.0 | 100.0 |
| Rae Bareli                 | 97.2 | 100.0     | 100.0     | 100.0     | 0.0 | 100.0 |
| Rampur                     | 33.5 | 0.0       | 0.0       | 100.0     | 0.0 | 100.0 |
| Saharanpur                 | 0.0  | 0.0       | 0.0       | 0.0       | 0.0 | 0.0   |
| Sant Kabir Nagar           | 36.9 | 0.0       | 0.0       | 100.0     | 0.0 | 100.0 |
| Sant Ravidas Nagar Bhadohi | 12.4 | 0.0       | 0.0       | 0.0       | 0.0 | 100.0 |
| Shahjahanpur               | 35.8 | 0.0       | 0.0       | 100.0     | 0.0 | 100.0 |
| Shrawasti                  | 46.3 | 0.0       | 0.0       | 100.0     | 0.0 | 100.0 |
| Siddharthnagar             | 45.2 | 0.0       | 0.0       | 100.0     | 0.0 | 100.0 |
| Sitapur                    | 39.6 | 0.0       | 0.0       | 100.0     | 0.0 | 100.0 |
| Sonbhadra                  | 24.6 | 0.0       | 0.0       | 0.0       | 0.0 | 100.0 |
| Sultanpur                  | 90.0 | 100.0     | 100.0     | 100.0     | 0.0 | 100.0 |
| Unnao                      | 36.6 | 0.0       | 0.0       | 100.0     | 0.0 | 100.0 |
| Varanasi                   | 0.0  | 0.0       | 0.0       | 0.0       | 0.0 | 0.0   |
| Total                      | 31.1 | 0.0       | 0.0       | 100.0     | 0.0 | 100.0 |

Table A6: Summary statistics on the implementation of RGGVY, by district.



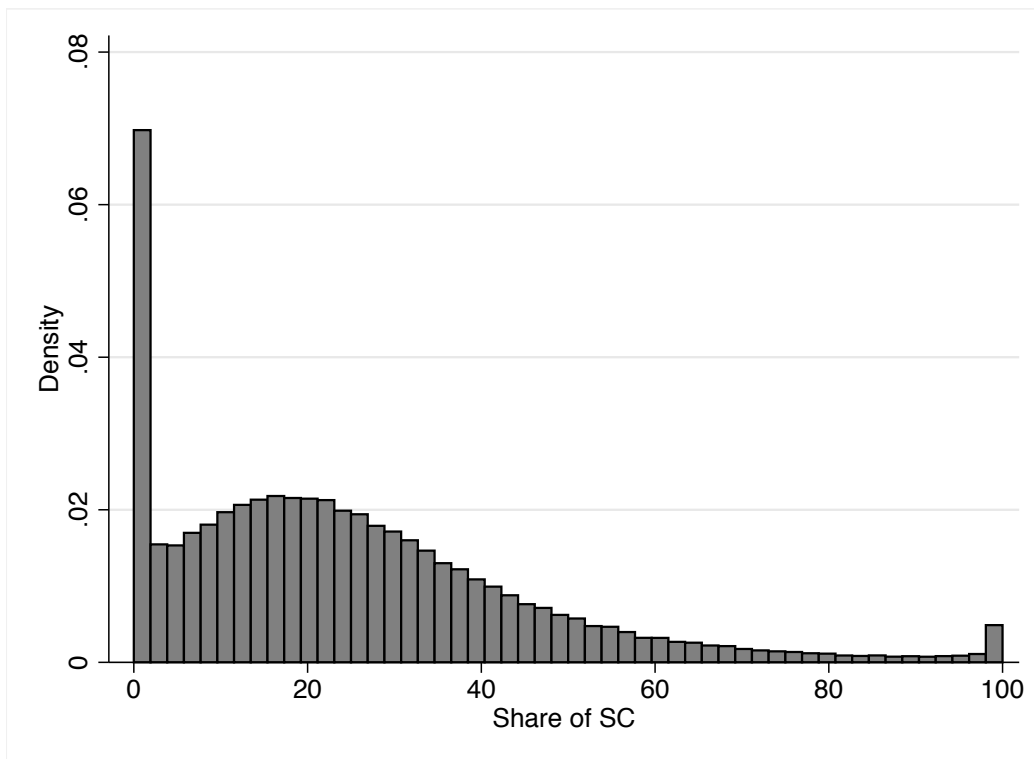

Figure A3: Distribution of the share of scheduled caste members per village (entire sample).

Figure A3 demonstrates that there is considerable variation across villages in SC population. The  $x$ -axis shows the SC population percentage on a 0-100 scale, and the  $y$ -axis shows the density of different percentages. While a large number of villages have no SC population at all and there are also villages with only SC people, the vast majority of the villages fall on a right-skewed normal distribution. The average SC percentage in our dataset is 24.6%.

## A2 Pre-RGGVY Rural Electrification

In conducting our study, we consider the relationship between village electrification and SC population *before* the RGGVY begins. To achieve this goal, we use the 2001 Census of India. While this earlier census unfortunately does not contain information about household electrification, it does allow us to compute SC population percentages and assess village electrification. Table A7 regresses the electrification status in 2001 on the village SC population percentage. The SC percentage is actually *positively* correlated with the likelihood of village electrification. Increasing the

SC percentage by 10 points, for example, increases the probability of village electrification by approximately 1 percentage point across the models – an association that is sensitive neither to the inclusion of fixed effects nor to that of control variables.

If the Dalit population is generally underprivileged in India and Uttar Pradesh, why would their villages enjoy higher levels of electrification before the RGGVY? To understand the initially puzzling relationship between SC population percentage and village electrification, Table A8 offers summary statistics by the decile of SC population percentage. As the table shows, the surprising result is almost entirely driven by villages with no Dalits at all: the difference between the 2nd and 10th decile in the probability of village electrification is only 6 percentage points, while the difference between the 1st and 2nd decile alone is 7 percentage points. Because villages without Dalits tend to be very small (average population: 429), it is unsurprising that they have no village electrification. Villages in all other deciles are larger, so they have higher probabilities of village electrification and road construction, but their development outcomes (no assets, literacy) are not very different.

- Table A7 regresses the electrification status in 2001 on the village SC population percentage. The dependent variable in all models is electrification status in 2001, which is 100 if the village is electrified and zero otherwise. Models 2-6 include constituency fixed effects, and standard errors are clustered by constituency throughout.
- Table A8 offers summary statistics by the decile of SC population percentage.

|                  | (1)                | (2)               | (3)                | (4)               | (5)               | (6)                |
|------------------|--------------------|-------------------|--------------------|-------------------|-------------------|--------------------|
| Share SC (%)     | 0.11***<br>(0.02)  | 0.10***<br>(0.01) | 0.10***<br>(0.01)  | 0.10***<br>(0.01) | 0.10***<br>(0.01) | 0.10***<br>(0.01)  |
| Distance (log)   |                    |                   | -0.98***<br>(0.21) |                   |                   | -0.90***<br>(0.21) |
| Population (log) |                    |                   |                    | 4.07***<br>(0.31) |                   | 3.92***<br>(0.32)  |
| Pucca Road       |                    |                   |                    |                   | 3.20***<br>(0.48) | 1.32***<br>(0.47)  |
| Constant         | 33.15***<br>(0.77) |                   |                    |                   |                   |                    |
| Constituency FE  |                    | ✓                 | ✓                  | ✓                 | ✓                 | ✓                  |
| Observations     | 96557              | 96557             | 90683              | 96557             | 96196             | 90454              |
| $R^2$            | 0.00               | 0.00              | 0.00               | 0.01              | 0.00              | 0.01               |
| # Clusters       | 402                | 402               | 401                | 402               | 402               | 401                |

Standard errors in parentheses

\*  $p < 0.10$ , \*\*  $p < 0.05$ , \*\*\*  $p < 0.01$

Table A7: Dependent variable: electrification status in 2001 (= 100 if electrified; 0 otherwise). All models estimated with constituency fixed effects. The standard errors are clustered by constituency.

| <b>Decile</b> | <b>Share of SC<br/>(cutoff)</b> | <b>Dom. Electricity<br/>(2001)</b> | <b>Population</b> | <b>Road</b> | <b>No assets</b> | <b>Literacy</b> | <b>Distance to<br/>nearest town</b> |
|---------------|---------------------------------|------------------------------------|-------------------|-------------|------------------|-----------------|-------------------------------------|
| 1st           | 0%                              | 26.4%                              | 429               | 50.3%       | 9.1%             | 57%             | 15.6                                |
| 2nd           | 6.2%                            | 33.2%                              | 1460              | 64.2%       | 11.2%            | 53.8%           | 16.3                                |
| 3rd           | 11.6%                           | 35.5%                              | 1947              | 67.0%       | 10.8%            | 54.6%           | 17.1                                |
| 4th           | 16.3%                           | 36.7%                              | 2121              | 68.3%       | 10.6%            | 55.5%           | 17.6                                |
| 5th           | 21.0%                           | 37.0%                              | 2080              | 69.3%       | 10.4%            | 56.4%           | 17.3                                |
| 6th           | 25.8%                           | 36.4%                              | 2011              | 70.0%       | 10.6%            | 56.6%           | 17.4                                |
| 7th           | 31.5%                           | 37.1%                              | 1914              | 69.5%       | 10.5%            | 57.1%           | 17.5                                |
| 8th           | 38.9%                           | 38.4%                              | 1715              | 70.2%       | 10.9%            | 56.9%           | 17.6                                |
| 9th           | 51.3%                           | 38.8%                              | 1450              | 68.8%       | 11.3%            | 56.2%           | 17.8                                |
| 10th          | Above 51.3%                     | 39.2%                              | 976               | 66.8%       | 14.0%            | 53.2%           | 17.6                                |

Table A8: Dependent variable: village electrification rate/probability (%) in 2001 by decile of SC population percentage in a given village. The second decile is somewhat smaller than the others because villages with zero percent SC are excluded from this group.

### **A3 Regression Discontinuity: Identifying Assumptions**

In an RDD analysis, local average treatment effects are identified by quantifying a discontinuous jump in the outcome at the threshold (Imbens and Lemieux, 2008). In our case, this means comparing RGGVY implementation between electoral constituencies that were barely won or lost by the BSP. The basic identifying assumption is that while the outcome may be related to the forcing variable, such as the margin of victory, the sharp discontinuity at the cut-off – in our case, BSP victory – allows the estimation of local average treatment effects for villages within electoral constituencies in which the BSP barely won or lost.

The identifying assumption can be tested in several ways. The first is to compare pre-treatment covariate values in constituencies barely won or lost by the BSP. These balance statistics are provided in Table A12 to A14. As the table shows, the treatment (BSP victory by a narrow margin) and control (BSP loss by a narrow margin) are statistically indistinguishable for pre-treatment covariates.

Following McCrary (2008), we also examine any discontinuities at the cut-off (Figure A6). The test shows that there is no suspicious discontinuity, alleviating concerns about electoral fraud and other irregularities in the conduct of election.

To scrutinize the external validity of the results, we also replicate them in the full sample. While the full sample estimation does not admit causal inference, it can be used to see whether the correlations in the data are broadly consistent with the results from the close elections. If they are consistent, this observation alleviates concerns about close elections being a special case without external validity.

### **A4 Regression Discontinuity: Summary Statistics**

- Figure A4 shows the margin of victory for each constituency-election in the RDD sample (5% margin of victory).
- Table A9 summarizes the RDD sample. The upper panel summarizes the data at the village level; the lower panel summarizes the data at the constituency-election level. In total, we

have 235 close constituency-elections when the sample is restricted to a 5% margin of victory.

- Table A10 compares BSP and non-BSP MLAs. As the table shows, both the candidate and constituency characteristics are mostly similar. The only exception – an unsurprising one – is that BSP MLAs tend to come from SC-reserved constituencies.
- Figure A5 shows the kernel density function for the SC share in the RDD sample.
- Table A5 is the histogram of BSP wins and losses (i.e. when it came second) based on a  $\pm 5$  percent margin.
- Table A11 reports the summary statistics for the main variables used for the regression discontinuity analysis (using a  $\pm 5$  percent margin).

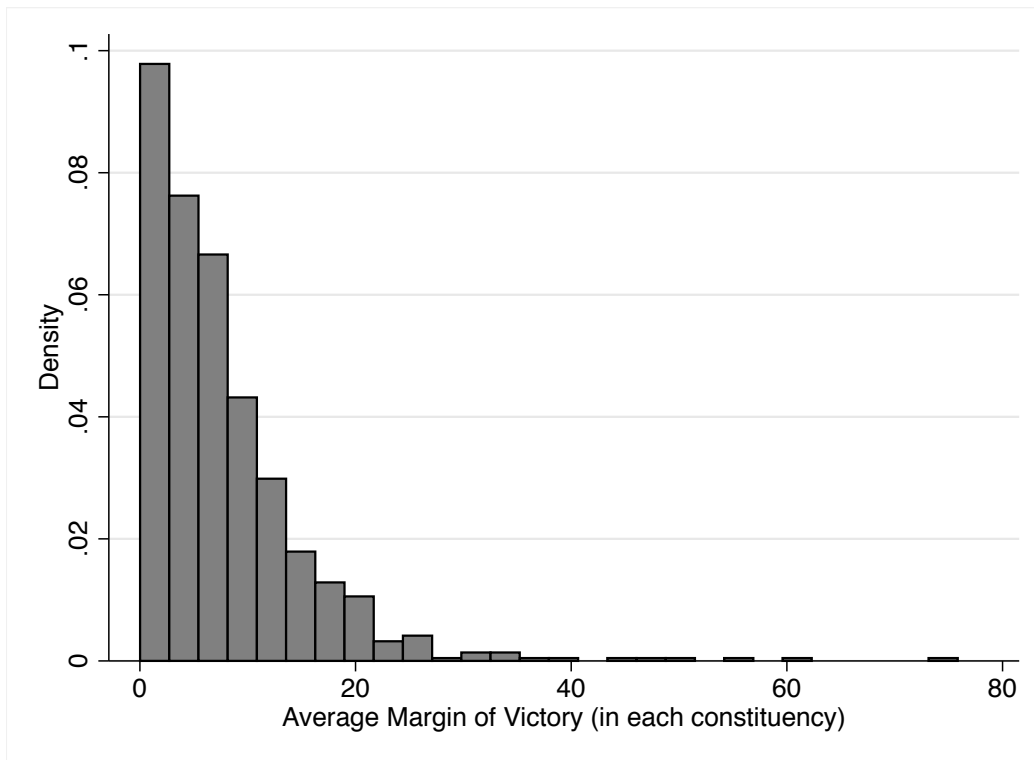

Figure A4: Distribution of the margin of victory for the winning party against the first runner-up in each constituency-election.

| <i>Category</i>                                  | <b>Village Level</b> |                    |                            |
|--------------------------------------------------|----------------------|--------------------|----------------------------|
|                                                  | <i>Won by BSP</i>    | <i>Lost by BSP</i> | <i>Total # of villages</i> |
| All village-elections                            | 77,617               | 115,497            | 193,114                    |
| All village-elections, BSP top-2                 | 77,617               | 53,723             | 131,340                    |
| All villages, 2002, BSP top-2                    | 25,556               | 27,277             | 52,833                     |
| All villages, 2007, BSP top-2                    | 52,061               | 26,446             | 78,507                     |
| Village-elections, BSP top-2, 1% win/loss margin | 7,170                | 6,916              | 14,086                     |
| Village-elections, BSP top-2, 2% win/loss margin | 14,266               | 12,527             | 26,793                     |
| Village-elections, BSP top-2, 5% win/loss margin | 34,281               | 27,798             | 62,079                     |

| <i>Category</i>                                       | <b>Constituency Level</b> |                    |                                  |
|-------------------------------------------------------|---------------------------|--------------------|----------------------------------|
|                                                       | <i>Won by BSP</i>         | <i>Lost by BSP</i> | <i>Total # of constituencies</i> |
| All constituency-elections                            | 303                       | 501                | 804                              |
| All constituency-elections, BSP top-2                 | 303                       | 217                | 520                              |
| All constituencies, 2002, BSP top-2                   | 98                        | 108                | 206                              |
| All constituencies, 2007, BSP top-2                   | 205                       | 109                | 314                              |
| Constituency-elections, BSP top-2, 1% win/loss margin | 27                        | 29                 | 56                               |
| Constituency-elections, BSP top-2, 2% win/loss margin | 51                        | 50                 | 101                              |
| Constituency-elections, BSP top-2, 5% win/loss margin | 129                       | 106                | 235                              |

Table A9: Summary of the RDD sample.

|                                       | Full Sample |         | 5% Sample |         |
|---------------------------------------|-------------|---------|-----------|---------|
|                                       | Non-BSP     | BSP     | Non-BSP   | BSP     |
| <b>Candidate Characteristics</b>      |             |         |           |         |
| Male                                  | 0.934       | 0.951   | 0.96      | 0.974   |
| Higher Education                      | 0.67        | 0.568   | 0.65      | 0.623   |
| Number of Criminal Charges            | 1.107       | 1.01    | 1.25      | 0.961   |
| Asset (10,000 rupees)                 | 1,448.601   | 832.718 | 1,094.880 | 649.169 |
| Debt (10,000 rupees)                  | 100.952     | 136.879 | 76.930    | 87.660  |
| <b>Constituency Characteristics</b>   |             |         |           |         |
| SC Constituency                       | 0.142       | 0.301   | 0.11      | 0.208   |
| Domestic Electricity (2001)           | 0.342       | 0.32    | 0.318     | 0.308   |
| Household Electrification Rate (2011) | 0.267       | 0.248   | 0.256     | 0.229   |
| Literacy Rate (2001)                  | 0.558       | 0.563   | 0.556     | 0.56    |
| Literacy Rate (2011)                  | 0.424       | 0.432   | 0.421     | 0.429   |
| Number of Electors (10,000 people)    | 28.422      | 27.941  | 28.502    | 28.258  |
| Num. Obs.                             | 197         | 206     | 100       | 77      |

Table A10: Comparison between BSP and non-BSP MLAs.

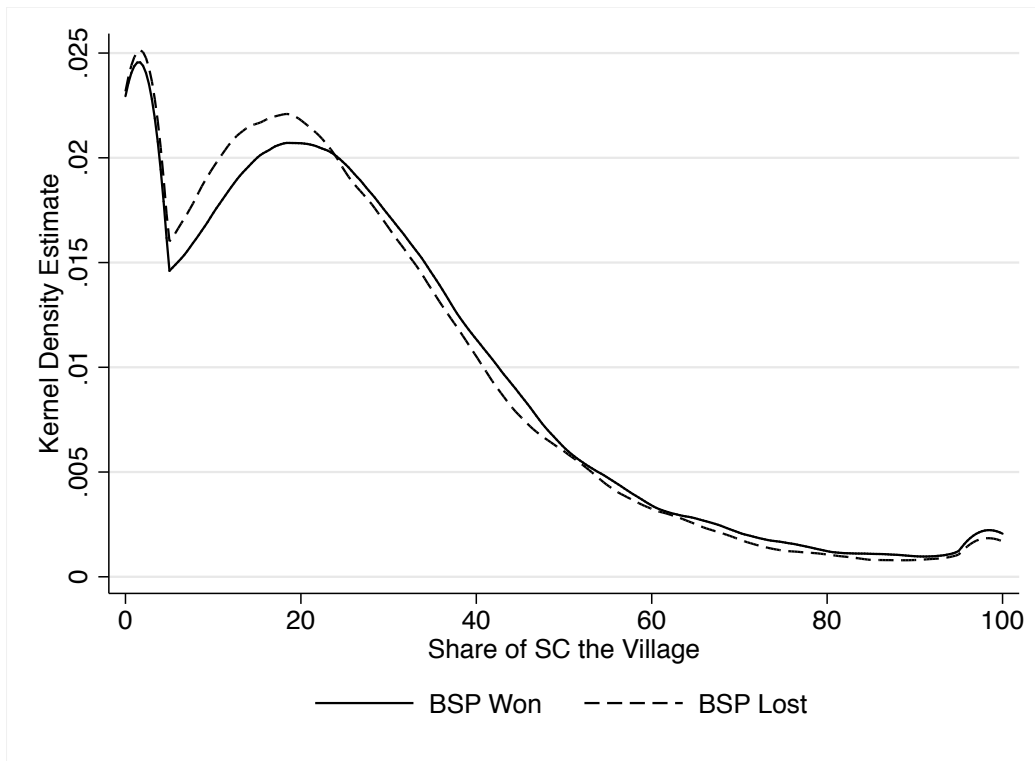

Figure A5: Histogram (kernel density function) of the share of SC in the sample, split by cases where BSP won and BSP came second, when the margin of victory is  $\pm 5$  percent.



| <b>Summary Statistic</b>     |       |       |      |     |       |
|------------------------------|-------|-------|------|-----|-------|
|                              | Mean  | S.D.  | Min. | Max | Obs.  |
| RGGVY                        | 30.40 | 46.00 | 0    | 100 | 62079 |
| Domestic Electricity (2001)  | 34.82 | 47.64 | 0    | 100 | 62079 |
| Lighting Source: Electricity | 21.84 | 23.10 | 0    | 100 | 62079 |
| Share SC (%)                 | 25.30 | 21.22 | 0    | 100 | 62079 |
| BSP Margin                   | 0.27  | 2.77  | -5   | 5   | 62079 |
| BSP Win                      | 0.55  | 0.50  | 0    | 1   | 62079 |
| Population (log)             | 6.85  | 1.11  | 1    | 11  | 62079 |
| Distance (log)               | 2.44  | 1.09  | 0    | 5   | 58571 |
| Pucca Road                   | 0.64  | 0.48  | 0    | 1   | 61800 |
| Lack of Asset                | 10.84 | 10.22 | 0    | 100 | 62079 |
| Literacy Rate (%)            | 56.11 | 11.09 | 0    | 100 | 62079 |

Table A11: Summary statistics for the sample used in the RDD study (observations with a margin below 5%). The unit of analysis is village-election.

## A5 Regression Discontinuity: Balance Statistics and Density Tests

- Tables A12-A14 show the balance statistics for the 1%, 2%, and 5% RDD samples.
- Figure A6 shows the results of a McCrary (2008) density test.

|                                                                  | BSP=0   |        |      | BSP=1   |        |      | P-value<br>of Difference |
|------------------------------------------------------------------|---------|--------|------|---------|--------|------|--------------------------|
|                                                                  | Mean    | S.D.   | Obs. | Mean    | S.D.   | Obs. |                          |
| Margin of Victory                                                | 0.49    | 0.29   | 29   | 0.46    | 0.26   | 27   | 0.67                     |
| Total Scheduled Castes Population of Village                     | 416.01  | 153.25 | 29   | 375.72  | 134.61 | 27   | 0.30                     |
| Total Scheduled Tribes Population of Village                     | 6.60    | 18.14  | 29   | 4.89    | 11.42  | 27   | 0.68                     |
| Total Population of Village                                      | 1718.45 | 596.54 | 29   | 1633.89 | 465.20 | 27   | 0.57                     |
| Area of Village (hectares)                                       | 253.77  | 165.12 | 29   | 186.54  | 89.90  | 27   | 0.07                     |
| Number of Co-operative Commercial Bank<br>Credit Societies (Y/N) | 0.02    | 0.01   | 29   | 0.02    | 0.02   | 27   | 0.95                     |
| Paved Road                                                       | 0.07    | 0.04   | 29   | 0.09    | 0.04   | 27   | 0.15                     |
| Distance from the Nearest Town (km)                              | 0.59    | 0.13   | 29   | 0.60    | 0.13   | 27   | 0.77                     |
| Power Supply (A/NA)                                              | 11.10   | 3.56   | 29   | 8.76    | 1.94   | 27   | <0.01**                  |
| Domestic Electricity (2001)                                      | 0.68    | 0.17   | 29   | 0.75    | 0.18   | 27   | 0.18                     |
| Agricultural Electricity (2001)                                  | 0.36    | 0.13   | 29   | 0.31    | 0.12   | 27   | 0.10                     |
| Electricity (other purposes) (2001)                              | 0.23    | 0.13   | 29   | 0.23    | 0.12   | 27   | 0.91                     |
| Electricity (all purposes) (2001)                                | 0.02    | 0.02   | 29   | 0.02    | 0.02   | 27   | 0.21                     |
| Total Irrigated Area                                             | 0.25    | 0.19   | 29   | 0.37    | 0.23   | 27   | 0.05**                   |
| Unirrigated Area                                                 | 186.39  | 147.11 | 29   | 206.10  | 474.68 | 27   | 0.83                     |
|                                                                  | 88.30   | 136.55 | 29   | 41.85   | 53.19  | 27   | 0.10                     |

Table A12: Balance statistic at the constituency-election level. Village-elections where the winning margin was below 1 percent, and where neither of the top-2 candidates were members of BSP, were dropped. The summary statistics of each variable were then computed by constituency-election. The p-value is based on a *t* test where the null hypothesis that the means are equal. \*=p<0.05, \*\*=p<0.01.

|                                                                  | BSP=0   |        |      | BSP=1   |        |      | P-value<br>of Difference |
|------------------------------------------------------------------|---------|--------|------|---------|--------|------|--------------------------|
|                                                                  | Mean    | S.D.   | Obs. | Mean    | S.D.   | Obs. |                          |
| Margin of Victory                                                | 0.94    | 0.61   | 50   | 0.95    | 0.60   | 51   | 0.96                     |
| Total Scheduled Castes Population of Village                     | 415.83  | 163.59 | 50   | 407.57  | 170.79 | 51   | 0.80                     |
| Total Scheduled Tribes Population of Village                     | 7.74    | 17.80  | 50   | 3.24    | 8.51   | 51   | 0.11                     |
| Total Population of Village                                      | 1773.85 | 670.28 | 50   | 1697.81 | 688.36 | 51   | 0.58                     |
| Area of Village (hectares)                                       | 248.56  | 167.96 | 50   | 222.03  | 164.19 | 51   | 0.42                     |
| Number of Co-operative Commercial Bank<br>Credit Societies (Y/N) | 0.02    | 0.02   | 50   | 0.02    | 0.02   | 51   | 0.76                     |
| Paved Road                                                       | 0.07    | 0.04   | 50   | 0.08    | 0.04   | 51   | 0.22                     |
| Distance from the Nearest Town (km)                              | 0.60    | 0.15   | 50   | 0.62    | 0.15   | 51   | 0.46                     |
| Power Supply (A/NA)                                              | 10.37   | 3.52   | 50   | 9.30    | 2.08   | 51   | 0.07                     |
| Domestic Electricity (2001)                                      | 0.68    | 0.18   | 50   | 0.75    | 0.18   | 51   | 0.07                     |
| Agricultural Electricity (2001)                                  | 0.37    | 0.14   | 50   | 0.32    | 0.12   | 51   | 0.05*                    |
| Electricity (other purposes) (2001)                              | 0.21    | 0.13   | 50   | 0.23    | 0.10   | 51   | 0.48                     |
| Electricity (all purposes) (2001)                                | 0.02    | 0.02   | 50   | 0.02    | 0.02   | 51   | 0.57                     |
| Total Irrigated Area                                             | 0.25    | 0.18   | 50   | 0.36    | 0.23   | 51   | 0.01**                   |
| Unirrigated Area                                                 | 158.13  | 122.51 | 50   | 171.55  | 348.69 | 51   | 0.80                     |
|                                                                  | 68.78   | 112.23 | 50   | 51.43   | 86.38  | 51   | 0.39                     |

Table A13: Balance statistic at the constituency-election level. Village-elections where the winning margin was below 2 percent, and where neither of the top-2 candidates were members of BSP, were dropped. The summary statistics of each variable were then computed by constituency-election. The p-value is based on a *t* test where the null hypothesis that the means are equal. \*= $p < 0.05$ , \*\*= $p < 0.01$ .

|                                                                  | BSP=0   |        |      | BSP=1   |        |      | P-value<br>of Difference |
|------------------------------------------------------------------|---------|--------|------|---------|--------|------|--------------------------|
|                                                                  | Mean    | S.D.   | Obs. | Mean    | S.D.   | Obs. |                          |
| Margin of Victory                                                | 2.26    | 1.50   | 106  | 2.41    | 1.41   | 129  | 0.44                     |
| Total Scheduled Castes Population of Village                     | 399.95  | 167.34 | 106  | 416.86  | 176.11 | 129  | 0.45                     |
| Total Scheduled Tribes Population of Village                     | 6.86    | 16.02  | 106  | 13.46   | 79.49  | 129  | 0.40                     |
| Total Population of Village                                      | 1784.53 | 632.58 | 106  | 1744.80 | 725.18 | 129  | 0.66                     |
| Area of Village (hectares)                                       | 236.47  | 146.58 | 106  | 246.75  | 197.21 | 129  | 0.66                     |
| Number of Co-operative Commercial Bank<br>Credit Societies (Y/N) | 0.02    | 0.02   | 106  | 0.02    | 0.01   | 129  | 0.52                     |
| Paved Road                                                       | 0.08    | 0.04   | 106  | 0.08    | 0.04   | 129  | 0.84                     |
| Distance from the Nearest Town (km)                              | 0.61    | 0.15   | 106  | 0.60    | 0.13   | 129  | 0.75                     |
| Power Supply (A/NA)                                              | 9.95    | 3.58   | 106  | 9.75    | 2.81   | 129  | 0.63                     |
| Domestic Electricity (2001)                                      | 0.71    | 0.18   | 106  | 0.71    | 0.18   | 129  | 0.93                     |
| Agricultural Electricity (2001)                                  | 0.37    | 0.14   | 106  | 0.34    | 0.12   | 129  | 0.15                     |
| Electricity (other purposes) (2001)                              | 0.23    | 0.13   | 106  | 0.25    | 0.13   | 129  | 0.33                     |
| Electricity (all purposes) (2001)                                | 0.02    | 0.02   | 106  | 0.02    | 0.02   | 129  | 0.33                     |
| Total Irrigated Area                                             | 0.29    | 0.20   | 106  | 0.30    | 0.20   | 129  | 0.58                     |
| Unirrigated Area                                                 | 176.48  | 264.17 | 106  | 151.78  | 239.28 | 129  | 0.45                     |
|                                                                  | 69.04   | 162.54 | 106  | 67.29   | 178.48 | 129  | 0.93                     |

Table A14: Balance statistic at the constituency-election level. Village-elections where the winning margin was below 5 percent, and where neither of the top-2 candidates were members of BSP, were dropped. The summary statistics of each variable were then computed by constituency-election. The p-value is based on a *t* test where the null hypothesis that the means are equal. \*= $p < 0.05$ , \*\*= $p < 0.01$ .

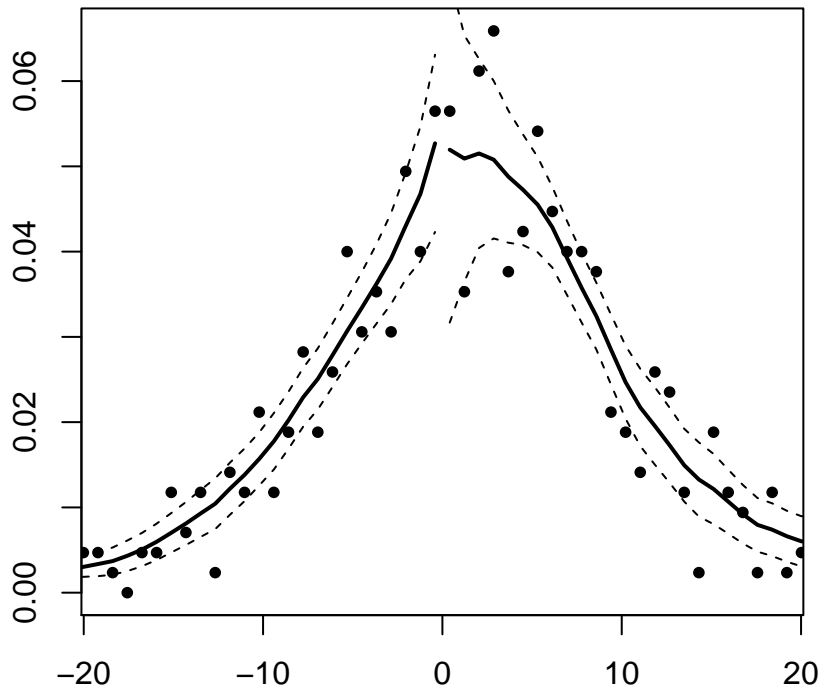

Figure A6: McCrary (2008) density test shows that there is no suspicious discontinuity in the treatment assignment around the cutoff. The  $p$ -value for rejecting the null hypothesis is 0.77.

## A6 Regression Discontinuity: Additional Analysis

- In Table A15, we estimate the correlation between a BSP victory and RGGVY implementation in the full sample.
- Table A16 reports the estimates of the RDD analysis, limiting the sample to 2002.
- Table A17 reports the estimates of the RDD analysis, limiting the sample to 2007.
- Table A18 reports the estimates of the RDD analysis, but adds an interaction effect between the treatment (a BSP win) and the share of SC in the village. The sample is limited to 2002.
- Table A19 reports the estimates of the RDD analysis, but adds an interaction effect between the treatment (a BSP win) and the share of SC in the village. The sample is limited to 2007.
- Figures A7-A9 reports the regression discontinuity graph. Unlike traditional RDD figures, we bin observations to account for the dichotomous nature of the dependent variable (RGGVY).

|                    | (1)      | (2)      | (3)      | (4)      | (5)      | (6)      | (7)      | (8)      |
|--------------------|----------|----------|----------|----------|----------|----------|----------|----------|
| BSP Win            | -3.06*   | -3.32*   | -0.53    | -0.47    | -2.07    | -2.29    | 0.02     | 0.04     |
|                    | (1.78)   | (1.93)   | (3.13)   | (3.13)   | (1.93)   | (2.08)   | (3.40)   | (3.39)   |
| 2007 Election      |          | 0.91*    | 0.72     | 0.72     |          | 0.74     | 0.46     | 0.47     |
|                    |          | (0.54)   | (1.15)   | (1.15)   |          | (0.54)   | (1.15)   | (1.14)   |
| BSP Margin         |          |          | -0.09    | -0.04    |          |          | -0.05    | -0.02    |
|                    |          |          | (0.19)   | (0.26)   |          |          | (0.19)   | (0.25)   |
| BSP Win * Margin   |          |          |          | -0.10    |          |          |          | -0.08    |
|                    |          |          |          | (0.32)   |          |          |          | (0.32)   |
| BSP Win * Share SC |          |          |          |          | -0.02    | -0.02    | -0.02    | -0.02    |
|                    |          |          |          |          | (0.03)   | (0.03)   | (0.03)   | (0.03)   |
| Share SC (%)       |          |          |          |          | -0.16*** | -0.16*** | -0.16*** | -0.16*** |
|                    |          |          |          |          | (0.03)   | (0.03)   | (0.03)   | (0.03)   |
| Constant           | 32.31*** | 31.96*** | 29.88*** | 30.18*** | 36.15*** | 35.86*** | 34.08*** | 34.32*** |
|                    | (1.52)   | (1.40)   | (2.20)   | (2.42)   | (1.59)   | (1.49)   | (2.48)   | (2.74)   |
| Observations       | 193114   | 193114   | 131340   | 131340   | 193114   | 193114   | 131340   | 131340   |
| R <sup>2</sup>     | 0.00     | 0.00     | 0.00     | 0.00     | 0.01     | 0.01     | 0.01     | 0.01     |
| # Clusters         | 402      | 402      | 340      | 340      | 402      | 402      | 340      | 340      |

Standard errors in parentheses

\*  $p < 0.10$ , \*\*  $p < 0.05$ , \*\*\*  $p < 0.01$

Table A15: Full sample, mimicking both the RDD and the RDD with interactions. Dependent variable: RGGVY (if present, RGGVY= 100). The standard errors are clustered by constituency.



|                  | Margin<1%          |                     |                    | Margin<2%          |                    |                    | Margin<5%          |                    |                    |
|------------------|--------------------|---------------------|--------------------|--------------------|--------------------|--------------------|--------------------|--------------------|--------------------|
|                  | (1)                | (2)                 | (3)                | (4)                | (5)                | (6)                | (7)                | (8)                | (9)                |
| BSP Win          | 6.16<br>(6.98)     | 29.42**<br>(13.70)  | 32.68**<br>(14.20) | 0.92<br>(7.35)     | 13.57<br>(10.27)   | 14.04<br>(10.24)   | 0.35<br>(4.90)     | 1.93<br>(8.57)     | 2.06<br>(8.43)     |
| BSP Margin       |                    | -27.36**<br>(11.21) | -11.59<br>(6.88)   |                    | -8.07<br>(6.24)    | -3.98<br>(8.31)    |                    | -0.33<br>(1.64)    | 0.99<br>(2.14)     |
| BSP Win * Margin |                    |                     | -37.24<br>(23.83)  |                    |                    | -8.85<br>(11.76)   |                    |                    | -2.78<br>(3.19)    |
| Constant         | 27.70***<br>(2.62) | 16.69***<br>(5.25)  | 23.04***<br>(3.28) | 32.06***<br>(5.64) | 25.70***<br>(4.92) | 28.93***<br>(4.69) | 30.01***<br>(3.74) | 29.20***<br>(5.04) | 32.47***<br>(5.84) |
| Observations     | 6967               | 6967                | 6967               | 10914              | 10914              | 10914              | 26051              | 26051              | 26051              |
| R <sup>2</sup>   | 0.00               | 0.03                | 0.04               | 0.00               | 0.01               | 0.01               | 0.00               | 0.00               | 0.00               |
| # Clusters       | 29                 | 29                  | 29                 | 45                 | 45                 | 45                 | 99                 | 99                 | 99                 |

Standard errors in parentheses

\*  $p < 0.10$ , \*\*  $p < 0.05$ , \*\*\*  $p < 0.01$

Table A16: Dependent variable: RGGVY (= 100). Standard errors clustered by constituency. The sample is limited to 2002.

|                  | Margin<1%          |                    |                    | Margin<2%          |                    |                    | Margin<5%          |                    |                    |
|------------------|--------------------|--------------------|--------------------|--------------------|--------------------|--------------------|--------------------|--------------------|--------------------|
|                  | (1)                | (2)                | (3)                | (4)                | (5)                | (6)                | (7)                | (8)                | (9)                |
| BSP Win          | 0.01<br>(7.02)     | -19.20<br>(15.03)  | -19.09<br>(14.73)  | -5.59<br>(5.75)    | 3.37<br>(10.26)    | 3.49<br>(10.37)    | -1.81<br>(3.69)    | 0.92<br>(6.92)     | 0.83<br>(6.90)     |
| BSP Margin       |                    | 20.77<br>(13.08)   | 18.69<br>(13.79)   |                    | -4.11<br>(4.59)    | -3.36<br>(6.57)    |                    | -0.59<br>(1.24)    | -0.36<br>(2.04)    |
| BSP Win * Margin |                    |                    | 3.68<br>(24.59)    |                    |                    | -1.60<br>(9.17)    |                    |                    | -0.40<br>(2.55)    |
| Constant         | 30.06***<br>(3.87) | 39.03***<br>(6.98) | 38.13***<br>(7.77) | 32.76***<br>(3.96) | 28.34***<br>(5.01) | 29.15***<br>(6.11) | 31.60***<br>(2.90) | 30.29***<br>(3.55) | 30.80***<br>(4.58) |
| Observations     | 7119               | 7119               | 7119               | 15879              | 15879              | 15879              | 36028              | 36028              | 36028              |
| $R^2$            | 0.00               | 0.01               | 0.01               | 0.00               | 0.01               | 0.01               | 0.00               | 0.00               | 0.00               |
| # Clusters       | 27                 | 27                 | 27                 | 56                 | 56                 | 56                 | 136                | 136                | 136                |

Standard errors in parentheses

\*  $p < 0.10$ , \*\*  $p < 0.05$ , \*\*\*  $p < 0.01$

Table A17: Dependent variable: RGGVY (= 100). Standard errors clustered by constituency. The sample is limited to 2007.

|                       | Margin < 1%        |                     |                    | Margin < 2%        |                    |                    | Margin < 5%        |                    |                    |
|-----------------------|--------------------|---------------------|--------------------|--------------------|--------------------|--------------------|--------------------|--------------------|--------------------|
|                       | (1)                | (2)                 | (3)                | (4)                | (5)                | (6)                | (7)                | (8)                | (9)                |
| BSP Win               | 4.39<br>(7.74)     | 29.87*<br>(15.03)   | 32.94**<br>(14.98) | 0.69<br>(8.02)     | 13.82<br>(10.81)   | 13.76<br>(10.39)   | 0.23<br>(5.75)     | 1.46<br>(8.77)     | 1.38<br>(8.58)     |
| BSP Win * Share SC/ST | 0.06<br>(0.11)     | -0.03<br>(0.10)     | -0.02<br>(0.11)    | 0.01<br>(0.10)     | -0.03<br>(0.09)    | -0.01<br>(0.09)    | 0.01<br>(0.07)     | 0.01<br>(0.06)     | 0.02<br>(0.07)     |
| Share SC/ST (%)       | -0.19**<br>(0.08)  | -0.13<br>(0.08)     | -0.17*<br>(0.08)   | -0.20***<br>(0.07) | -0.17**<br>(0.07)  | -0.19***<br>(0.07) | -0.15***<br>(0.05) | -0.15***<br>(0.05) | -0.16***<br>(0.05) |
| BSP Margin            |                    | -27.07**<br>(11.64) | -9.68<br>(7.59)    |                    | -7.65<br>(6.28)    | -2.82<br>(8.33)    |                    | -0.25<br>(1.65)    | 1.15<br>(2.14)     |
| BSP Win * Margin      |                    |                     | -40.69<br>(24.21)  |                    |                    | -10.28<br>(11.70)  |                    |                    | -2.93<br>(3.21)    |
| Constant              | 33.17***<br>(4.14) | 20.62***<br>(7.40)  | 28.68***<br>(5.65) | 37.58***<br>(6.55) | 30.57***<br>(5.92) | 34.99***<br>(5.57) | 34.02***<br>(4.44) | 33.37***<br>(5.52) | 37.02***<br>(6.12) |
| Observations          | 6967               | 6967                | 6967               | 10914              | 10914              | 10914              | 26051              | 26051              | 26051              |
| R <sup>2</sup>        | 0.01               | 0.04                | 0.05               | 0.01               | 0.02               | 0.02               | 0.00               | 0.01               | 0.01               |
| # Clusters            | 29                 | 29                  | 29                 | 45                 | 45                 | 45                 | 99                 | 99                 | 99                 |

Standard errors in parentheses

\*  $p < 0.10$ , \*\*  $p < 0.05$ , \*\*\*  $p < 0.01$

Table A18: Dependent variable: RGGVY (= 100). The treatment (a BSP win) is interacted with the share of SC in the village. Standard errors clustered by constituency. The sample is limited to 2002.

|                       | Margin < 1%        |                    |                    | Margin < 2%        |                    |                    | Margin < 5%        |                    |                    |
|-----------------------|--------------------|--------------------|--------------------|--------------------|--------------------|--------------------|--------------------|--------------------|--------------------|
|                       | (1)                | (2)                | (3)                | (4)                | (5)                | (6)                | (7)                | (8)                | (9)                |
| BSP Win               | 0.44<br>(7.88)     | -17.61<br>(15.21)  | -17.57<br>(15.10)  | -7.87<br>(6.85)    | -0.39<br>(10.05)   | -0.36<br>(10.09)   | -0.63<br>(4.52)    | 1.43<br>(7.31)     | 1.23<br>(7.27)     |
| BSP Win * Share SC/ST | -0.08<br>(0.09)    | -0.07<br>(0.10)    | -0.07<br>(0.10)    | 0.09<br>(0.08)     | 0.10<br>(0.08)     | 0.10<br>(0.08)     | -0.03<br>(0.06)    | -0.03<br>(0.06)    | -0.03<br>(0.06)    |
| Share SC/ST (%)       | -0.30***<br>(0.08) | -0.30***<br>(0.08) | -0.30***<br>(0.08) | -0.33***<br>(0.06) | -0.33***<br>(0.06) | -0.33***<br>(0.06) | -0.23***<br>(0.05) | -0.23***<br>(0.05) | -0.23***<br>(0.05) |
| BSP Margin            |                    | 19.32<br>(12.93)   | 17.67<br>(14.36)   |                    | -3.50<br>(4.53)    | -2.99<br>(6.47)    |                    | -0.43<br>(1.22)    | -0.08<br>(2.03)    |
| BSP Win * Margin      |                    |                    | 2.93<br>(24.52)    |                    |                    | -1.09<br>(9.05)    |                    |                    | -0.62<br>(2.53)    |
| Constant              | 37.66***<br>(5.06) | 45.79***<br>(7.27) | 45.10***<br>(8.04) | 40.80***<br>(4.97) | 36.93***<br>(5.47) | 37.50***<br>(6.22) | 36.98***<br>(3.57) | 35.96***<br>(4.05) | 36.80***<br>(4.94) |
| Observations          | 7119               | 7119               | 7119               | 15879              | 15879              | 15879              | 36028              | 36028              | 36028              |
| R <sup>2</sup>        | 0.02               | 0.03               | 0.03               | 0.02               | 0.02               | 0.02               | 0.01               | 0.01               | 0.01               |
| # Clusters            | 27                 | 27                 | 27                 | 56                 | 56                 | 56                 | 136                | 136                | 136                |

Standard errors in parentheses

\*  $p < 0.10$ , \*\*  $p < 0.05$ , \*\*\*  $p < 0.01$

Table A19: Dependent variable: RGGVY (= 100). The treatment (a BSP win) is interacted with the share of SC in the village. Standard errors clustered by constituency. The sample is limited to 2007.

|                  | Margin<3%          |                    |                    |                    | Margin<4%          |                    |                    |                    |
|------------------|--------------------|--------------------|--------------------|--------------------|--------------------|--------------------|--------------------|--------------------|
|                  | (1)                | (2)                | (3)                | (4)                | (5)                | (6)                | (7)                | (8)                |
| BSP Win          | -0.50<br>(3.87)    | -0.46<br>(3.85)    | 3.00<br>(6.11)     | 2.96<br>(6.11)     | -1.28<br>(3.45)    | -1.28<br>(3.45)    | 3.09<br>(5.70)     | 2.96<br>(5.68)     |
| 2007 Election    |                    | -0.95<br>(3.33)    | -0.86<br>(3.30)    | -0.58<br>(3.27)    |                    | 0.19<br>(2.78)     | 0.16<br>(2.77)     | 0.26<br>(2.74)     |
| BSP Margin       |                    |                    | -1.18<br>(1.88)    | -0.25<br>(2.74)    |                    |                    | -1.16<br>(1.31)    | -0.61<br>(1.99)    |
| BSP Win * Margin |                    |                    |                    | -1.83<br>(3.75)    |                    |                    |                    | -1.01<br>(2.59)    |
| Constant         | 31.26***<br>(2.93) | 31.82***<br>(3.85) | 30.05***<br>(3.90) | 31.23***<br>(4.23) | 31.64***<br>(2.70) | 31.52***<br>(3.40) | 29.43***<br>(3.69) | 30.38***<br>(4.22) |
| Observations     | 40121              | 40121              | 40121              | 40121              | 50797              | 50797              | 50797              | 50797              |
| $R^2$            | 0.00               | 0.00               | 0.00               | 0.00               | 0.00               | 0.00               | 0.00               | 0.00               |
| # Clusters       | 142                | 142                | 142                | 142                | 174                | 174                | 174                | 174                |

Standard errors in parentheses

\*  $p < 0.10$ , \*\*  $p < 0.05$ , \*\*\*  $p < 0.01$

Table A20: Dependent variable: RGGVY (= 100). The treatment (a BSP win) is interacted with the share of SC in the village. Standard errors clustered by constituency. Different set of bandwidths.

|                   | (1)                | (2)                | (3)                | (4)                | (5)                | (6)                | (7)                | (8)                |
|-------------------|--------------------|--------------------|--------------------|--------------------|--------------------|--------------------|--------------------|--------------------|
| SC Win            | 1.05<br>(2.63)     | 1.05<br>(2.63)     | -1.94<br>(3.00)    | -2.22<br>(3.11)    | 2.09<br>(3.22)     | 2.09<br>(3.22)     | -0.87<br>(3.60)    | -1.27<br>(3.78)    |
| 2007 Election     |                    | -0.17<br>(0.57)    | -0.31<br>(0.61)    | -0.31<br>(0.62)    |                    | -0.14<br>(0.57)    | -0.28<br>(0.61)    | -0.27<br>(0.62)    |
| SC Margin         |                    | 0.21*<br>(0.12)    | 0.21*<br>(0.12)    | 0.20<br>(0.13)     |                    |                    | 0.21*<br>(0.12)    | 0.19<br>(0.13)     |
| SC Win * Margin   |                    |                    |                    | 0.07<br>(0.27)     |                    |                    |                    | 0.10<br>(0.27)     |
| SC Win * Share SC |                    |                    |                    |                    | 0.00<br>(0.05)     | 0.00<br>(0.05)     | -0.00<br>(0.05)    | -0.00<br>(0.05)    |
| Share SC (%)      |                    |                    |                    |                    | -0.19***<br>(0.02) | -0.19***<br>(0.02) | -0.19***<br>(0.02) | -0.19***<br>(0.02) |
| Constant          | 30.48***<br>(1.29) | 30.57***<br>(1.36) | 32.14***<br>(1.69) | 32.04***<br>(1.77) | 34.78***<br>(1.41) | 34.85***<br>(1.48) | 36.45***<br>(1.80) | 36.30***<br>(1.88) |
| Observations      | 181791             | 181791             | 181791             | 181791             | 181791             | 181791             | 181791             | 181791             |
| R <sup>2</sup>    | 0.00               | 0.00               | 0.00               | 0.00               | 0.01               | 0.01               | 0.01               | 0.01               |
| # Clusters        | 399                | 399                | 399                | 399                | 399                | 399                | 399                | 399                |

Standard errors in parentheses

\*  $p < 0.10$ , \*\*  $p < 0.05$ , \*\*\*  $p < 0.01$

Table A21: RDD analysis with SC victory effects (instead of BSP): 1%, 2%, 5% bandwidths. Dependent variable: RGGVY (if present, RGGVY=100). The standard errors are clustered by constituency.

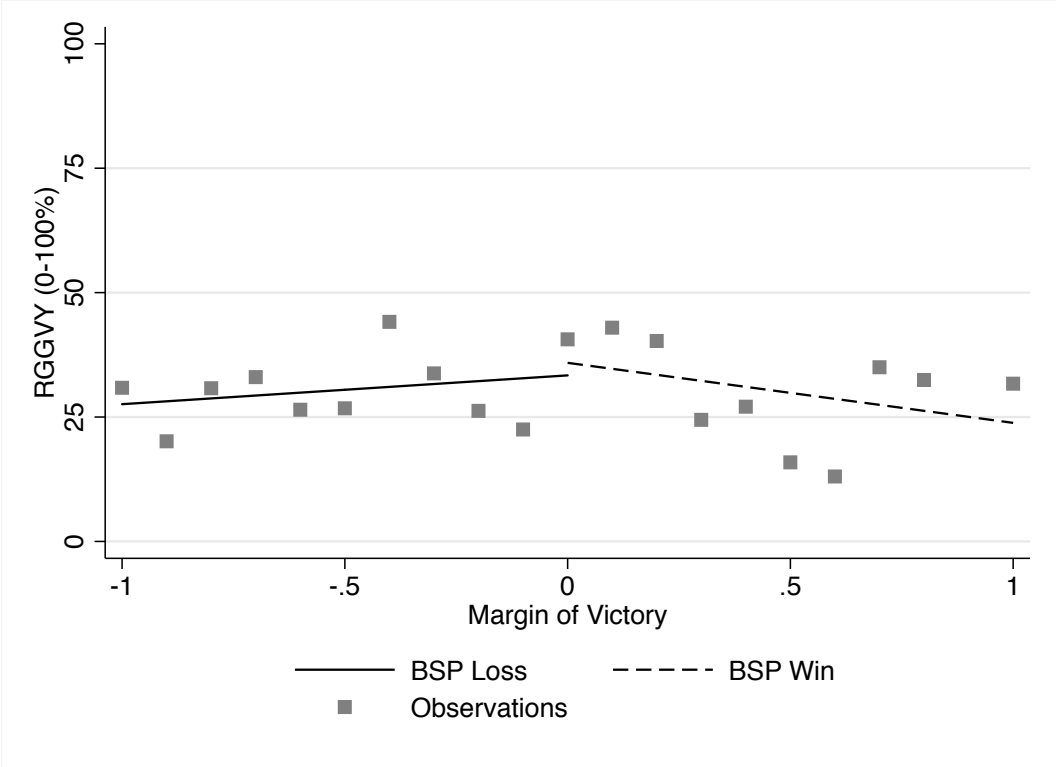

Figure A7: Regression discontinuity graph with a 1% margin. Observations are binned by slides of 0.1 (i.e. from -1 to -0.9, from -0.9 to -0.8, ..., from 0.9 to 1). Within each bin, we take the share of villages that have benefited from RGGVY. These are the observations plotted on the x- and y-axis, respectively. We then fit two linear regressions on either side of the cutoff.

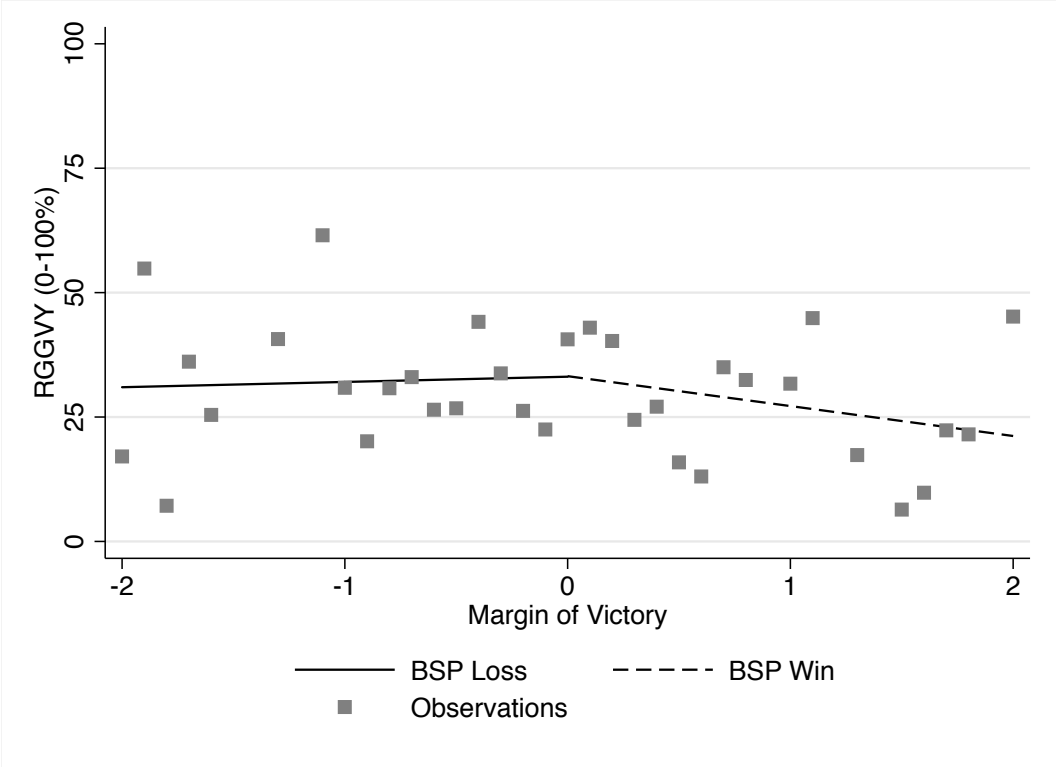

Figure A8: Regression discontinuity graph with a 2% margin. Observations are binned by slides of 0.1 (i.e. from -2 to -1.9, from -1.9 to -1.8, ..., from 1.9 to 2). Within each bin, we take the share of villages that have benefited from RGGVY. These are the observations plotted on the x- and y-axis, respectively. We then fit two linear regressions on either side of the cutoff.



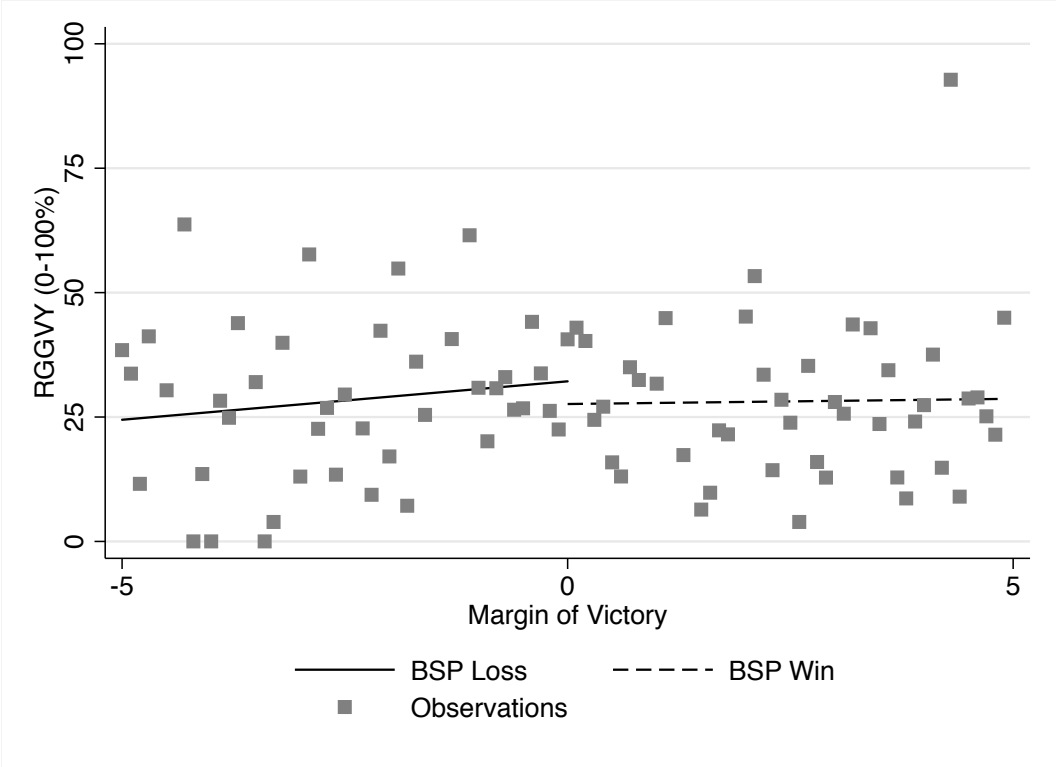

Figure A9: Regression discontinuity graph with a 5% margin. Observations are binned by slides of 0.1 (i.e. from -5 to -4.9, from -4.9 to -4.8, ..., from 4.9 to 5). Within each bin, we take the share of villages that have benefited from RGGVY. These are the observations plotted on the x- and y-axis, respectively. We then fit two linear regressions on either side of the cutoff.

## A7 Regression Discontinuity: Conditioning on Reservation Status

- Table A22 conditions the effect of a BSP win on the constituency reservation status (SC versus general). The samples are based on the regression discontinuity thresholds.
- Table A23 conditions the effect of a BSP win on the constituency reservation status (SC versus general). All available observations are used to produce the estimates.
- Table A24 splits the analysis between reserved and non-reserved constituencies. As a result, the effect of a BSP win is interacted with the SC share in the village population, the margin of victory, and the reservation status.

|                       | Margin<1%          |                    |                    |                    | Margin<2%          |                    |                    |                    | Margin<5%          |                    |                    |
|-----------------------|--------------------|--------------------|--------------------|--------------------|--------------------|--------------------|--------------------|--------------------|--------------------|--------------------|--------------------|
|                       | (1)                | (2)                | (3)                | (4)                | (5)                | (6)                | (7)                | (8)                | (9)                | (10)               | (11)               |
| BSP Win               | 1.81<br>(5.86)     | 1.81<br>(5.86)     | 2.98<br>(12.40)    | 3.64<br>(13.49)    | -6.72<br>(5.53)    | -6.95<br>(5.59)    | 3.12<br>(8.15)     | 2.83<br>(8.10)     | -1.77<br>(4.04)    | -1.77<br>(4.04)    | 0.51<br>(5.86)     |
| BSP Win * Share SC    | -0.01<br>(0.09)    | -0.01<br>(0.08)    | -0.02<br>(0.08)    | -0.01<br>(0.08)    | 0.03<br>(0.06)     | 0.03<br>(0.06)     | 0.02<br>(0.06)     | 0.03<br>(0.06)     | -0.05<br>(0.05)    | -0.05<br>(0.05)    | -0.05<br>(0.05)    |
| Share SC (%)          | -0.25***<br>(0.05) | -0.25***<br>(0.05) | -0.25***<br>(0.05) | -0.26***<br>(0.05) | -0.25***<br>(0.04) | -0.26***<br>(0.04) | -0.25***<br>(0.04) | -0.25***<br>(0.04) | -0.18***<br>(0.04) | -0.18***<br>(0.04) | -0.18***<br>(0.04) |
| Reserved Constituency | 2.63<br>(4.42)     | 2.63<br>(4.40)     | 2.48<br>(4.51)     | 2.93<br>(4.10)     | -6.58<br>(5.29)    | -7.93<br>(5.61)    | -5.91<br>(5.97)    | -6.76<br>(5.79)    | -4.85<br>(5.58)    | -5.02<br>(5.82)    | -4.93<br>(5.94)    |
| Reserved*BSP Win      | 17.97<br>(11.26)   | 17.97<br>(11.53)   | 17.72<br>(12.38)   | 15.98<br>(14.31)   | 16.48<br>(13.01)   | 17.70<br>(12.78)   | 16.32<br>(12.34)   | 17.59<br>(11.99)   | 11.74<br>(7.82)    | 11.87<br>(7.98)    | 12.06<br>(7.93)    |
| 2007 Election         |                    | 0.00<br>(4.82)     | -0.04<br>(4.98)    | 0.03<br>(4.95)     |                    | -4.31<br>(4.60)    | -3.85<br>(4.52)    | -3.02<br>(4.57)    |                    | -0.46<br>(2.56)    | -0.36<br>(2.57)    |
| BSP Margin            |                    |                    | -1.28<br>(10.92)   | 2.69<br>(7.25)     |                    |                    | -4.91<br>(3.67)    | -1.99<br>(5.05)    |                    |                    | -0.48<br>(0.96)    |
| BSP Win * Margin      |                    |                    |                    | -8.43<br>(22.20)   |                    |                    |                    | -6.02<br>(7.23)    |                    |                    |                    |
| Constant              | 34.71***<br>(4.26) | 34.71***<br>(4.91) | 34.22***<br>(5.91) | 35.79***<br>(5.97) | 40.67***<br>(4.49) | 43.63***<br>(5.85) | 37.87***<br>(6.09) | 40.54***<br>(6.42) | 36.41***<br>(3.21) | 36.71***<br>(3.78) | 35.46***<br>(4.39) |
| Observations          | 14086              | 14086              | 14086              | 14086              | 26793              | 26793              | 26793              | 26793              | 62079              | 62079              | 62079              |
| R <sup>2</sup>        | 0.02               | 0.02               | 0.02               | 0.02               | 0.02               | 0.02               | 0.02               | 0.03               | 0.01               | 0.01               | 0.01               |
| # Clusters            | 55                 | 55                 | 55                 | 55                 | 97                 | 97                 | 97                 | 97                 | 200                | 200                | 200                |

Standard errors in parentheses  
\*  $p < 0.10$ , \*\*  $p < 0.05$ , \*\*\*  $p < 0.01$

Table A22: Dependent variable: RGGVY (= 100). Standard errors clustered by constituency. Additional controls based on reservation status. Regression discontinuity framework.

|                       | (1)                | (2)                | (3)                | (4)                |
|-----------------------|--------------------|--------------------|--------------------|--------------------|
| BSP Win               | -1.21<br>(2.16)    | -1.46<br>(2.25)    | -0.15<br>(3.63)    | -0.15<br>(3.62)    |
| BSP Win * Share SC    | -0.03<br>(0.03)    | -0.03<br>(0.03)    | -0.05<br>(0.03)    | -0.05<br>(0.04)    |
| Share SC (%)          | -0.18***<br>(0.03) | -0.18***<br>(0.03) | -0.15***<br>(0.03) | -0.15***<br>(0.03) |
| Reserved Constituency | 4.65<br>(4.15)     | 4.74<br>(4.16)     | -2.50<br>(4.27)    | -2.60<br>(4.32)    |
| Reserved*BSP Win      | -4.91<br>(4.99)    | -5.07<br>(5.03)    | 2.30<br>(4.68)     | 2.50<br>(4.84)     |
| Triple Interaction    | 0.06<br>(0.05)     | 0.06<br>(0.05)     | 0.06<br>(0.05)     | 0.06<br>(0.05)     |
| 2007 Election         |                    | 0.90<br>(0.60)     | 0.30<br>(1.19)     | 0.30<br>(1.18)     |
| BSP Margin            |                    |                    | -0.06<br>(0.19)    | -0.00<br>(0.26)    |
| BSP Win * Margin      |                    |                    |                    | -0.12<br>(0.33)    |
| Constant              | 35.46***<br>(1.73) | 35.09***<br>(1.67) | 34.54***<br>(2.75) | 34.92***<br>(3.07) |
| Observations          | 193114             | 193114             | 131340             | 131340             |
| $R^2$                 | 0.01               | 0.01               | 0.01               | 0.01               |
| # Clusters            | 402                | 402                | 340                | 340                |

Standard errors in parentheses

\*  $p < 0.10$ , \*\*  $p < 0.05$ , \*\*\*  $p < 0.01$

Table A23: Dependent variable: RGGVY (= 100). Standard errors clustered by constituency. Additional controls based on reservation status. The sample includes all available observations.

|                    | Non-Reserved       |                    |                    |                    | Reserved           |                    |                    |                    |
|--------------------|--------------------|--------------------|--------------------|--------------------|--------------------|--------------------|--------------------|--------------------|
|                    | (1)                | (2)                | (3)                | (4)                | (5)                | (6)                | (7)                | (8)                |
| BSP Win            | -1.10<br>(2.16)    | -1.22<br>(2.29)    | -1.42<br>(3.77)    | -0.99<br>(3.79)    | -6.51<br>(4.32)    | -7.65<br>(5.17)    | 6.89<br>(7.97)     | 10.99<br>(8.22)    |
| BSP Win * Share SC | -0.03<br>(0.03)    | -0.03<br>(0.03)    | -0.04<br>(0.04)    | -0.04<br>(0.04)    | 0.04<br>(0.06)     | 0.04<br>(0.06)     | -0.01<br>(0.06)    | -0.02<br>(0.06)    |
| Share SC (%)       | -0.17***<br>(0.03) | -0.17***<br>(0.03) | -0.16***<br>(0.03) | -0.16***<br>(0.03) | -0.19***<br>(0.06) | -0.19***<br>(0.06) | -0.13*<br>(0.07)   | -0.13*<br>(0.07)   |
| 2007 Election      |                    | 0.41<br>(0.48)     | 0.29<br>(1.30)     | 0.31<br>(1.28)     |                    | 2.71<br>(2.24)     | -0.11<br>(2.84)    | -0.61<br>(2.82)    |
| BSP Margin         |                    |                    | 0.03<br>(0.21)     | 0.18<br>(0.23)     |                    |                    | -0.37<br>(0.45)    | -1.77*<br>(1.03)   |
| BSP Win * Margin   |                    |                    |                    | -0.39<br>(0.33)    |                    |                    |                    | 1.83*<br>(1.10)    |
| Constant           | 35.36***<br>(1.74) | 35.19***<br>(1.64) | 35.31***<br>(2.90) | 36.35***<br>(2.96) | 40.49***<br>(3.97) | 39.62***<br>(3.61) | 29.98***<br>(4.50) | 22.97***<br>(6.36) |
| Observations       | 147718             | 147718             | 98356              | 98356              | 45396              | 45396              | 32984              | 32984              |
| $R^2$              | 0.01               | 0.01               | 0.01               | 0.01               | 0.01               | 0.01               | 0.01               | 0.02               |
| # Clusters         | 314                | 314                | 259                | 259                | 89                 | 89                 | 82                 | 82                 |

Standard errors in parentheses

\*  $p < 0.10$ , \*\*  $p < 0.05$ , \*\*\*  $p < 0.01$

Table A24: Dependent variable: RGGVY (= 100). Standard errors clustered by constituency. Sample split by reservation status.

## A8 Regional Samples

- Tables A25-A28 show the main estimation results by region (West, Central, East, and Bundelkhand).

|                             | (1)                | (2)                | (3)                | (4)                | (5)                | (6)                |
|-----------------------------|--------------------|--------------------|--------------------|--------------------|--------------------|--------------------|
| Share SC (%)                | -0.31***<br>(0.02) | -0.31***<br>(0.02) | -0.28***<br>(0.02) | -0.29***<br>(0.02) | -0.30***<br>(0.02) | -0.26***<br>(0.02) |
| Distance (log)              |                    | 2.77***<br>(0.48)  |                    |                    |                    | 2.37***<br>(0.44)  |
| Domestic Electricity (2001) |                    |                    | -0.14***<br>(0.01) |                    |                    | -0.14***<br>(0.01) |
| Population (log)            |                    |                    |                    | -7.02***<br>(0.73) |                    | -6.70***<br>(0.75) |
| Pucca Road                  |                    |                    |                    |                    | -3.79***<br>(0.75) | -1.50**<br>(0.74)  |
| Constituency FE             | ✓                  | ✓                  | ✓                  | ✓                  | ✓                  | ✓                  |
| Observations                | 27022              | 25116              | 27022              | 27022              | 26970              | 25091              |
| $R^2$                       | 0.02               | 0.03               | 0.05               | 0.05               | 0.02               | 0.08               |
| # Clusters                  | 147                | 146                | 147                | 147                | 147                | 146                |

Standard errors in parentheses

\*  $p < 0.10$ , \*\*  $p < 0.05$ , \*\*\*  $p < 0.01$

Table A25: Dependent variable: RGGVY (= 100). The sample is limited to districts in the Western Region. Standard errors clustered by constituency.

|                             | (1)                | (2)                | (3)                | (4)                 | (5)                | (6)                 |
|-----------------------------|--------------------|--------------------|--------------------|---------------------|--------------------|---------------------|
| Share SC (%)                | -0.14***<br>(0.03) | -0.13***<br>(0.03) | -0.10***<br>(0.03) | -0.17***<br>(0.03)  | -0.13***<br>(0.03) | -0.13***<br>(0.03)  |
| Distance (log)              |                    | 1.15**<br>(0.49)   |                    |                     |                    | 0.77*<br>(0.45)     |
| Domestic Electricity (2001) |                    |                    | -0.22***<br>(0.02) |                     |                    | -0.19***<br>(0.02)  |
| Population (log)            |                    |                    |                    | -11.55***<br>(1.31) |                    | -10.05***<br>(1.23) |
| Pucca Road                  |                    |                    |                    |                     | -7.98***<br>(1.33) | -2.49**<br>(1.07)   |
| Constituency FE             | ✓                  | ✓                  | ✓                  | ✓                   | ✓                  | ✓                   |
| Observations                | 15098              | 13930              | 15098              | 15098               | 15017              | 13868               |
| $R^2$                       | 0.00               | 0.00               | 0.06               | 0.06                | 0.01               | 0.11                |
| # Clusters                  | 77                 | 77                 | 77                 | 77                  | 77                 | 77                  |

Standard errors in parentheses

\*  $p < 0.10$ , \*\*  $p < 0.05$ , \*\*\*  $p < 0.01$

Table A26: Dependent variable: RGGVY (= 100). The sample is limited to districts in the Central Region. Standard errors clustered by constituency.



|                             | (1)                | (2)                | (3)                | (4)                | (5)                | (6)                |
|-----------------------------|--------------------|--------------------|--------------------|--------------------|--------------------|--------------------|
| Share SC (%)                | -0.17***<br>(0.02) | -0.17***<br>(0.02) | -0.17***<br>(0.02) | -0.17***<br>(0.02) | -0.17***<br>(0.02) | -0.16***<br>(0.02) |
| Distance (log)              |                    | 0.90***<br>(0.27)  |                    |                    |                    | 0.73***<br>(0.27)  |
| Domestic Electricity (2001) |                    |                    | -0.12***<br>(0.01) |                    |                    | -0.11***<br>(0.01) |
| Population (log)            |                    |                    |                    | -5.15***<br>(0.50) |                    | -4.52***<br>(0.47) |
| Pucca Road                  |                    |                    |                    |                    | -5.03***<br>(0.67) | -2.32***<br>(0.59) |
| Constituency FE             | ✓                  | ✓                  | ✓                  | ✓                  | ✓                  | ✓                  |
| Observations                | 49976              | 47511              | 49976              | 49976              | 49817              | 47422              |
| $R^2$                       | 0.01               | 0.01               | 0.02               | 0.02               | 0.01               | 0.04               |
| # Clusters                  | 160                | 160                | 160                | 160                | 160                | 160                |

Standard errors in parentheses

\*  $p < 0.10$ , \*\*  $p < 0.05$ , \*\*\*  $p < 0.01$

Table A27: Dependent variable: RGGVY (= 100). The sample is limited to districts in the Eastern Region. Standard errors clustered by constituency.

|                             | (1)                | (2)                | (3)                | (4)                | (5)                | (6)                |
|-----------------------------|--------------------|--------------------|--------------------|--------------------|--------------------|--------------------|
| Share SC (%)                | -0.33***<br>(0.05) | -0.33***<br>(0.05) | -0.26***<br>(0.04) | -0.27***<br>(0.05) | -0.33***<br>(0.05) | -0.23***<br>(0.04) |
| Distance (log)              |                    | 2.00*<br>(1.14)    |                    |                    |                    | 2.12*<br>(1.14)    |
| Domestic Electricity (2001) |                    |                    | -0.23***<br>(0.02) |                    |                    | -0.20***<br>(0.02) |
| Population (log)            |                    |                    |                    | -9.85***<br>(1.17) |                    | -9.40***<br>(1.39) |
| Pucca Road                  |                    |                    |                    |                    | -8.85***<br>(2.01) | -3.66*<br>(1.93)   |
| Constituency FE             | ✓                  | ✓                  | ✓                  | ✓                  | ✓                  | ✓                  |
| Observations                | 4461               | 4126               | 4461               | 4461               | 4392               | 4073               |
| $R^2$                       | 0.02               | 0.02               | 0.08               | 0.08               | 0.03               | 0.14               |
| # Clusters                  | 24                 | 24                 | 24                 | 24                 | 24                 | 24                 |

Standard errors in parentheses

\*  $p < 0.10$ , \*\*  $p < 0.05$ , \*\*\*  $p < 0.01$

Table A28: Dependent variable: RGGVY (= 100). The sample is limited to districts in the Bundelkhand Region (south). Standard errors clustered by constituency.

## A9 Additional Results

|                             | (1)    | (2)    | (3)     | (4)      | (5)      | (6)      |
|-----------------------------|--------|--------|---------|----------|----------|----------|
| Share SC (%)                | 0.16*  | 0.14   | 0.13    | 0.12     | 0.11     | 0.04     |
|                             | (0.09) | (0.09) | (0.09)  | (0.09)   | (0.09)   | (0.10)   |
| Distance (log)              |        | -3.80* |         |          |          | -3.26    |
|                             |        | (2.20) |         |          |          | (2.19)   |
| Domestic Electricity (2001) |        |        | 0.31*** |          |          | 0.23***  |
|                             |        |        | (0.04)  |          |          | (0.03)   |
| Population (log)            |        |        |         | 40.66*** |          | 35.26*** |
|                             |        |        |         | (2.01)   |          | (2.07)   |
| Pucca Road                  |        |        |         |          | 79.13*** | 62.78*** |
|                             |        |        |         |          | (7.29)   | (7.79)   |
| Constituency FE             | ✓      | ✓      | ✓       | ✓        | ✓        | ✓        |
| Observations                | 95963  | 90236  | 95963   | 95963    | 95791    | 90110    |
| $R^2$                       | 0.00   | 0.00   | 0.00    | 0.02     | 0.01     | 0.03     |
| # Clusters                  | 402    | 401    | 402     | 402      | 402      | 401      |

Standard errors in parentheses

\*  $p < 0.10$ , \*\*  $p < 0.05$ , \*\*\*  $p < 0.01$

Table A29: Dependent variable: average hours of power supply per day (rescaled to 0 – 2400 for readability). Standard errors clustered by constituency.

| <b>Pooled</b>               |                     |                     |                     |                     |                     |                     |
|-----------------------------|---------------------|---------------------|---------------------|---------------------|---------------------|---------------------|
|                             | (1)                 | (2)                 | (3)                 | (4)                 | (5)                 | (6)                 |
| Share SC (%)                | -0.19***<br>(0.02)  | -0.18***<br>(0.02)  | -0.17***<br>(0.02)  | -0.18***<br>(0.02)  | -0.18***<br>(0.02)  | -0.16***<br>(0.02)  |
| Wealth Index                | -3.78***<br>(0.69)  | -3.93***<br>(0.69)  | -3.94***<br>(0.68)  | -3.36***<br>(0.69)  | -3.80***<br>(0.70)  | -3.67***<br>(0.69)  |
| Literacy Rate (%)           | -0.45***<br>(0.05)  | -0.45***<br>(0.05)  | -0.43***<br>(0.05)  | -0.50***<br>(0.05)  | -0.45***<br>(0.05)  | -0.48***<br>(0.05)  |
| # Coop Commercial Banks     | -12.87***<br>(1.41) | -12.54***<br>(1.45) | -12.94***<br>(1.39) | -5.41***<br>(1.21)  | -12.20***<br>(1.37) | -5.79***<br>(1.25)  |
| Irrigated Land (log)        | -1.14***<br>(0.21)  | -1.17***<br>(0.21)  | -1.06***<br>(0.21)  | -0.31<br>(0.22)     | -1.08***<br>(0.21)  | -0.36*<br>(0.21)    |
| Mean Light                  | -1.71***<br>(0.15)  | -1.63***<br>(0.15)  | -1.72***<br>(0.15)  | -1.58***<br>(0.14)  | -1.68***<br>(0.15)  | -1.51***<br>(0.15)  |
| Distance (log)              |                     | 2.02***<br>(0.47)   |                     |                     |                     | 2.16***<br>(0.44)   |
| Domestic Electricity (2001) |                     |                     | -0.15***<br>(0.01)  |                     |                     | -0.14***<br>(0.01)  |
| Population (log)            |                     |                     |                     | -6.08***<br>(0.48)  |                     | -5.30***<br>(0.46)  |
| Pucca Road                  |                     |                     |                     |                     | -4.70***<br>(0.88)  | -2.19***<br>(0.83)  |
| Constant                    | 69.88***<br>(2.91)  | 64.87***<br>(3.17)  | 73.68***<br>(2.82)  | 111.15***<br>(4.21) | 72.22***<br>(2.88)  | 104.98***<br>(4.46) |
| Observations                | 96557               | 90683               | 96557               | 96557               | 96196               | 90454               |
| R <sup>2</sup>              | 0.05                | 0.05                | 0.07                | 0.06                | 0.05                | 0.09                |
| # Clusters                  | 402                 | 401                 | 402                 | 402                 | 402                 | 401                 |

Standard errors in parentheses  
\*  $p < 0.10$ , \*\*  $p < 0.05$ , \*\*\*  $p < 0.01$

| <b>Constituency fixed effects</b> |                     |                     |                     |                     |                     |                     |
|-----------------------------------|---------------------|---------------------|---------------------|---------------------|---------------------|---------------------|
|                                   | (1)                 | (2)                 | (3)                 | (4)                 | (5)                 | (6)                 |
| Share SC (%)                      | -0.22***<br>(0.01)  | -0.22***<br>(0.01)  | -0.21***<br>(0.01)  | -0.22***<br>(0.01)  | -0.22***<br>(0.01)  | -0.20***<br>(0.01)  |
| Wealth Index                      | -1.85***<br>(0.24)  | -1.86***<br>(0.24)  | -1.80***<br>(0.23)  | -1.61***<br>(0.23)  | -1.87***<br>(0.23)  | -1.59***<br>(0.22)  |
| Literacy Rate (%)                 | -0.41***<br>(0.03)  | -0.42***<br>(0.03)  | -0.37***<br>(0.03)  | -0.44***<br>(0.03)  | -0.41***<br>(0.03)  | -0.41***<br>(0.03)  |
| # Coop Commercial Banks           | -12.60***<br>(1.04) | -12.28***<br>(1.07) | -12.97***<br>(1.06) | -5.54***<br>(0.95)  | -12.10***<br>(1.03) | -6.08***<br>(0.99)  |
| Irrigated Land (log)              | -1.17***<br>(0.11)  | -1.18***<br>(0.12)  | -1.04***<br>(0.11)  | -0.24**<br>(0.10)   | -1.11***<br>(0.11)  | -0.20**<br>(0.10)   |
| Mean Light                        | -0.98***<br>(0.10)  | -0.92***<br>(0.10)  | -0.94***<br>(0.09)  | -0.89***<br>(0.10)  | -0.98***<br>(0.09)  | -0.81***<br>(0.10)  |
| Distance (log)                    |                     | 0.86***<br>(0.20)   |                     |                     |                     | 0.69***<br>(0.20)   |
| Domestic Electricity (2001)       |                     |                     | -0.14***<br>(0.01)  |                     |                     | -0.13***<br>(0.01)  |
| Population (log)                  |                     |                     |                     | -6.47***<br>(0.39)  |                     | -5.81***<br>(0.38)  |
| Pucca Road                        |                     |                     |                     |                     | -4.80***<br>(0.45)  | -2.09***<br>(0.41)  |
| Constant                          | 66.54***<br>(1.73)  | 64.79***<br>(1.82)  | 68.28***<br>(1.66)  | 109.13***<br>(3.47) | 69.42***<br>(1.79)  | 106.33***<br>(3.30) |
| Observations                      | 96557               | 90683               | 96557               | 96557               | 96196               | 90454               |
| R <sup>2</sup>                    | 0.03                | 0.03                | 0.05                | 0.05                | 0.03                | 0.07                |
| # Clusters                        | 402                 | 401                 | 402                 | 402                 | 402                 | 401                 |
| Constituency FE                   | ✓                   | ✓                   | ✓                   | ✓                   | ✓                   | ✓                   |

Standard errors in parentheses  
\*  $p < 0.10$ , \*\*  $p < 0.05$ , \*\*\*  $p < 0.01$

Table A30: Dependent variable: RGGVY (if present, RGGVY= 100). The standard errors are clustered by constituency. Additional control variables (pre-RGGVY) for wealth and wealth-related confounders: literacy rate (%), number of cooperative commercial banks, irrigated land area (logarithmized), population (logarithmized), average decadal (1995-2004) nighttime luminosity in digital number on a 0-64 scale, with higher values indicating more light. All variables are from the 2001 Census of India, except night lights are from NOAA satellites.

**Pooled**

|                             | (1)                | (2)                | (3)                | (4)                | (5)                | (6)                |
|-----------------------------|--------------------|--------------------|--------------------|--------------------|--------------------|--------------------|
| Share SC (%)                | -0.18***<br>(0.05) | -0.17***<br>(0.05) | -0.16***<br>(0.05) | -0.18***<br>(0.05) | -0.17***<br>(0.05) | -0.15***<br>(0.05) |
| Margin of Victory           | -0.41<br>(0.38)    | -0.41<br>(0.39)    | -0.38<br>(0.37)    | -0.46<br>(0.37)    | -0.37<br>(0.37)    | -0.42<br>(0.36)    |
| Margin*Share SC             | 0.00<br>(0.01)     | 0.00<br>(0.01)     | 0.00<br>(0.01)     | 0.00<br>(0.01)     | 0.00<br>(0.01)     | 0.00<br>(0.01)     |
| Distance (log)              |                    | 2.52***<br>(0.73)  |                    |                    |                    | 2.53***<br>(0.70)  |
| Domestic Electricity (2001) |                    |                    | -0.16***<br>(0.02) |                    |                    | -0.14***<br>(0.01) |
| Population (log)            |                    |                    |                    | -6.73***<br>(0.84) |                    | -5.78***<br>(0.84) |
| Pucca Road                  |                    |                    |                    |                    | -6.78***<br>(1.59) | -3.00*<br>(1.62)   |
| Constant                    | 36.31***<br>(3.66) | 30.49***<br>(4.04) | 40.99***<br>(3.80) | 82.43***<br>(7.69) | 40.45***<br>(3.50) | 76.12***<br>(7.58) |
| Observations                | 25556              | 23877              | 25556              | 25556              | 25455              | 23829              |
| $R^2$                       | 0.01               | 0.01               | 0.03               | 0.03               | 0.01               | 0.06               |
| # Clusters                  | 98                 | 98                 | 98                 | 98                 | 98                 | 98                 |

**Constituency fixed effects**

|                             | (1)                | (2)                | (3)                | (4)                | (5)                | (6)                |
|-----------------------------|--------------------|--------------------|--------------------|--------------------|--------------------|--------------------|
| Share SC (%)                | -0.20***<br>(0.03) | -0.20***<br>(0.03) | -0.19***<br>(0.03) | -0.20***<br>(0.03) | -0.19***<br>(0.03) | -0.19***<br>(0.03) |
| Margin*Share SC             | -0.00<br>(0.00)    | -0.00<br>(0.00)    | 0.00<br>(0.00)     | 0.00<br>(0.00)     | -0.00<br>(0.00)    | 0.00<br>(0.00)     |
| Distance (log)              |                    | 1.28***<br>(0.44)  |                    |                    |                    | 1.08**<br>(0.42)   |
| Domestic Electricity (2001) |                    |                    | -0.14***<br>(0.02) |                    |                    | -0.13***<br>(0.01) |
| Population (log)            |                    |                    |                    | -7.05***<br>(0.73) |                    | -6.12***<br>(0.66) |
| Pucca Road                  |                    |                    |                    |                    | -6.35***<br>(0.89) | -3.17***<br>(0.77) |
| Constituency FE             | ✓                  | ✓                  | ✓                  | ✓                  | ✓                  | ✓                  |
| Observations                | 25556              | 23877              | 25556              | 25556              | 25455              | 23829              |
| $R^2$                       | 0.01               | 0.01               | 0.03               | 0.04               | 0.01               | 0.06               |
| # Clusters                  | 98                 | 98                 | 98                 | 98                 | 98                 | 98                 |

Standard errors in parentheses

\*  $p < 0.10$ , \*\*  $p < 0.05$ , \*\*\*  $p < 0.01$ 

Table A31: Safe vs. marginal seats. Dependent variable: RGGVY (if present, RGGVY= 100). The standard errors are clustered by constituency. The sample is limited to cases in which a BSP member won.

**Pooled**

|                             | (1)                | (2)                | (3)                | (4)                | (5)                | (6)                |
|-----------------------------|--------------------|--------------------|--------------------|--------------------|--------------------|--------------------|
| Share SC (%)                | -0.16***<br>(0.02) | -0.16***<br>(0.02) | -0.14***<br>(0.02) | -0.16***<br>(0.02) | -0.15***<br>(0.02) | -0.13***<br>(0.02) |
| Distance (log)              |                    | 3.15***<br>(0.48)  |                    |                    |                    | 3.26***<br>(0.46)  |
| Domestic Electricity (2001) |                    |                    | -0.16***<br>(0.01) |                    |                    | -0.14***<br>(0.01) |
| Population (log)            |                    |                    |                    | -6.52***<br>(0.50) |                    | -5.66***<br>(0.48) |
| Pucca Road                  |                    |                    |                    |                    | -6.48***<br>(1.00) | -3.61***<br>(0.96) |
| Constant                    | 34.95***<br>(1.31) | 27.38***<br>(1.58) | 40.14***<br>(1.45) | 79.87***<br>(3.95) | 39.10***<br>(1.33) | 73.07***<br>(4.09) |
| Observations                | 96557              | 90683              | 96557              | 96557              | 96196              | 90454              |
| $R^2$                       | 0.01               | 0.01               | 0.03               | 0.03               | 0.01               | 0.06               |
| # Clusters                  | 402                | 401                | 402                | 402                | 402                | 401                |

**Constituency fixed effects**

|                             | (1)                | (2)                | (3)                | (4)                | (5)                | (6)                |
|-----------------------------|--------------------|--------------------|--------------------|--------------------|--------------------|--------------------|
| Share SC (%)                | -0.21***<br>(0.01) | -0.21***<br>(0.01) | -0.19***<br>(0.01) | -0.20***<br>(0.01) | -0.21***<br>(0.01) | -0.19***<br>(0.01) |
| Distance (log)              |                    | 1.34***<br>(0.22)  |                    |                    |                    | 1.10***<br>(0.21)  |
| Domestic Electricity (2001) |                    |                    | -0.15***<br>(0.01) |                    |                    | -0.13***<br>(0.01) |
| Population (log)            |                    |                    |                    | -6.64***<br>(0.40) |                    | -5.94***<br>(0.38) |
| Pucca Road                  |                    |                    |                    |                    | -5.41***<br>(0.47) | -2.31***<br>(0.42) |
| Constituency FE             | ✓                  | ✓                  | ✓                  | ✓                  | ✓                  | ✓                  |
| Observations                | 96557              | 90683              | 96557              | 96557              | 96196              | 90454              |
| $R^2$                       | 0.01               | 0.01               | 0.04               | 0.04               | 0.01               | 0.06               |
| # Clusters                  | 402                | 401                | 402                | 402                | 402                | 401                |

Standard errors in parentheses

\*  $p < 0.10$ , \*\*  $p < 0.05$ , \*\*\*  $p < 0.01$ 

Table A32: Dependent variable: RGGVY (if present, RGGVY= 100). We report the effect of scheduled castes (instead of the combined number of scheduled tribes and scheduled castes). The standard errors are clustered by constituency.

**Pooled**

|                             | (1)                | (2)                | (3)                | (4)                | (5)                | (6)                |
|-----------------------------|--------------------|--------------------|--------------------|--------------------|--------------------|--------------------|
| Share ST (%)                | -0.31***<br>(0.05) | -0.31***<br>(0.05) | -0.32***<br>(0.05) | -0.33***<br>(0.06) | -0.32***<br>(0.05) | -0.35***<br>(0.05) |
| Distance (log)              |                    | 3.14***<br>(0.47)  |                    |                    |                    | 3.26***<br>(0.45)  |
| Domestic Electricity (2001) |                    |                    | -0.16***<br>(0.01) |                    |                    | -0.15***<br>(0.01) |
| Population (log)            |                    |                    |                    | -6.59***<br>(0.50) |                    | -5.68***<br>(0.48) |
| Pucca Road                  |                    |                    |                    |                    | -6.88***<br>(1.00) | -3.92***<br>(0.97) |
| Constant                    | 31.30***<br>(1.21) | 23.88***<br>(1.46) | 37.06***<br>(1.36) | 76.86***<br>(3.80) | 35.90***<br>(1.25) | 70.62***<br>(3.96) |
| Observations                | 96557              | 90683              | 96557              | 96557              | 96196              | 90454              |
| $R^2$                       | 0.00               | 0.01               | 0.03               | 0.03               | 0.01               | 0.06               |
| # Clusters                  | 402                | 401                | 402                | 402                | 402                | 401                |

**Constituency fixed effects**

|                             | (1)               | (2)               | (3)                | (4)                | (5)                | (6)                |
|-----------------------------|-------------------|-------------------|--------------------|--------------------|--------------------|--------------------|
| Share ST (%)                | -0.15**<br>(0.07) | -0.14*<br>(0.07)  | -0.17**<br>(0.07)  | -0.15**<br>(0.06)  | -0.16**<br>(0.07)  | -0.17**<br>(0.07)  |
| Distance (log)              |                   | 1.40***<br>(0.22) |                    |                    |                    | 1.15***<br>(0.21)  |
| Domestic Electricity (2001) |                   |                   | -0.15***<br>(0.01) |                    |                    | -0.14***<br>(0.01) |
| Population (log)            |                   |                   |                    | -6.72***<br>(0.40) |                    | -5.97***<br>(0.38) |
| Pucca Road                  |                   |                   |                    |                    | -5.76***<br>(0.48) | -2.58***<br>(0.42) |
| Constituency FE             | ✓                 | ✓                 | ✓                  | ✓                  | ✓                  | ✓                  |
| Observations                | 96557             | 90683             | 96557              | 96557              | 96196              | 90454              |
| $R^2$                       | 0.00              | 0.00              | 0.03               | 0.03               | 0.00               | 0.05               |
| # Clusters                  | 402               | 401               | 402                | 402                | 402                | 401                |

Standard errors in parentheses

\*  $p < 0.10$ , \*\*  $p < 0.05$ , \*\*\*  $p < 0.01$ 

Table A33: Dependent variable: RGGVY (if present, RGGVY= 100). We report the effect of scheduled tribes (instead of the combined number of scheduled tribes and scheduled castes). The standard errors are clustered by constituency.



**Pooled**

|                             | (1)                | (2)                | (3)                | (4)                | (5)                | (6)                |
|-----------------------------|--------------------|--------------------|--------------------|--------------------|--------------------|--------------------|
| Share SC in 2001 (%)        | -0.18***<br>(0.02) | -0.17***<br>(0.02) | -0.16***<br>(0.02) | -0.17***<br>(0.02) | -0.17***<br>(0.02) | -0.15***<br>(0.02) |
| Distance (log)              |                    | 3.15***<br>(0.47)  |                    |                    |                    | 3.25***<br>(0.46)  |
| Domestic Electricity (2001) |                    |                    | -0.16***<br>(0.01) |                    |                    | -0.14***<br>(0.01) |
| Population (log)            |                    |                    |                    | -6.55***<br>(0.50) |                    | -5.69***<br>(0.49) |
| Pucca Road                  |                    |                    |                    |                    | -6.47***<br>(0.99) | -3.56***<br>(0.96) |
| Constant                    | 35.40***<br>(1.33) | 27.84***<br>(1.60) | 40.59***<br>(1.47) | 80.62***<br>(3.97) | 39.56***<br>(1.36) | 73.83***<br>(4.12) |
| Observations                | 96557              | 90683              | 96557              | 96557              | 96196              | 90454              |
| $R^2$                       | 0.01               | 0.01               | 0.03               | 0.03               | 0.01               | 0.06               |
| # Clusters                  | 402                | 401                | 402                | 402                | 402                | 401                |

**Constituency fixed effects**

|                             | (1)                | (2)                | (3)                | (4)                | (5)                | (6)                |
|-----------------------------|--------------------|--------------------|--------------------|--------------------|--------------------|--------------------|
| Share SC in 2001 (%)        | -0.21***<br>(0.01) | -0.21***<br>(0.01) | -0.20***<br>(0.01) | -0.21***<br>(0.01) | -0.21***<br>(0.01) | -0.19***<br>(0.01) |
| Distance (log)              |                    | 1.34***<br>(0.22)  |                    |                    |                    | 1.10***<br>(0.21)  |
| Domestic Electricity (2001) |                    |                    | -0.15***<br>(0.01) |                    |                    | -0.13***<br>(0.01) |
| Population (log)            |                    |                    |                    | -6.67***<br>(0.40) |                    | -5.96***<br>(0.38) |
| Pucca Road                  |                    |                    |                    |                    | -5.44***<br>(0.47) | -2.32***<br>(0.42) |
| Constituency FE             | ✓                  | ✓                  | ✓                  | ✓                  | ✓                  | ✓                  |
| Observations                | 96557              | 90683              | 96557              | 96557              | 96196              | 90454              |
| $R^2$                       | 0.01               | 0.01               | 0.04               | 0.04               | 0.01               | 0.06               |
| # Clusters                  | 402                | 401                | 402                | 402                | 402                | 401                |

Standard errors in parentheses

\*  $p < 0.10$ , \*\*  $p < 0.05$ , \*\*\*  $p < 0.01$ 

Table A34: Dependent variable: RGGVY (if present, RGGVY= 100). The data for the share of SC come from the 2001 Census instead of the 2011 one. The correlation between 2001 and 2011 share of SC is 0.92. The standard errors are clustered by constituency.

**Pooled**

|                             | (1)                | (2)                | (3)                | (4)                | (5)                | (6)                |
|-----------------------------|--------------------|--------------------|--------------------|--------------------|--------------------|--------------------|
| Share SC (%)                | -0.30***<br>(0.06) | -0.30***<br>(0.06) | -0.24***<br>(0.06) | 0.05<br>(0.06)     | -0.26***<br>(0.06) | 0.08<br>(0.06)     |
| Share SC (square)           | 0.00**<br>(0.00)   | 0.00***<br>(0.00)  | 0.00<br>(0.00)     | -0.00***<br>(0.00) | 0.00*<br>(0.00)    | -0.00***<br>(0.00) |
| Distance (log)              |                    | 3.19***<br>(0.47)  |                    |                    |                    | 3.20***<br>(0.45)  |
| Domestic Electricity (2001) |                    |                    | -0.16***<br>(0.01) |                    |                    | -0.14***<br>(0.01) |
| Population (log)            |                    |                    |                    | -7.20***<br>(0.49) |                    | -6.36***<br>(0.48) |
| Pucca Road                  |                    |                    |                    |                    | -6.33***<br>(0.98) | -3.61***<br>(0.96) |
| Constant                    | 36.73***<br>(1.37) | 29.12***<br>(1.74) | 41.43***<br>(1.50) | 82.65***<br>(3.93) | 40.46***<br>(1.42) | 76.11***<br>(4.06) |
| Observations                | 96557              | 90683              | 96557              | 96557              | 96196              | 90454              |
| $R^2$                       | 0.01               | 0.01               | 0.03               | 0.03               | 0.01               | 0.06               |
| # Clusters                  | 402                | 401                | 402                | 402                | 402                | 401                |

Standard errors in parentheses

\*  $p < 0.10$ , \*\*  $p < 0.05$ , \*\*\*  $p < 0.01$ **Constituency fixed effects**

|                             | (1)                | (2)                | (3)                | (4)                | (5)                | (6)                |
|-----------------------------|--------------------|--------------------|--------------------|--------------------|--------------------|--------------------|
| Share SC (%)                | -0.46***<br>(0.03) | -0.46***<br>(0.03) | -0.42***<br>(0.03) | -0.13***<br>(0.02) | -0.44***<br>(0.03) | -0.12***<br>(0.02) |
| Share SC (square)           | 0.00***<br>(0.00)  | 0.00***<br>(0.00)  | 0.00***<br>(0.00)  | -0.00***<br>(0.00) | 0.00***<br>(0.00)  | -0.00***<br>(0.00) |
| Distance (log)              |                    | 1.36***<br>(0.22)  |                    |                    |                    | 1.10***<br>(0.21)  |
| Domestic Electricity (2001) |                    |                    | -0.14***<br>(0.01) |                    |                    | -0.13***<br>(0.01) |
| Population (log)            |                    |                    |                    | -6.87***<br>(0.40) |                    | -6.15***<br>(0.39) |
| Pucca Road                  |                    |                    |                    |                    | -5.09***<br>(0.46) | -2.34***<br>(0.42) |
| Constant                    | 38.98***<br>(0.43) | 35.84***<br>(0.63) | 43.44***<br>(0.53) | 82.71***<br>(2.88) | 42.11***<br>(0.58) | 81.16***<br>(2.88) |
| Observations                | 96557              | 90683              | 96557              | 96557              | 96196              | 90454              |
| $R^2$                       | 0.01               | 0.01               | 0.04               | 0.04               | 0.01               | 0.06               |
| # Clusters                  | 402                | 401                | 402                | 402                | 402                | 401                |
| Constituency FE             | ✓                  | ✓                  | ✓                  | ✓                  | ✓                  | ✓                  |

Standard errors in parentheses

\*  $p < 0.10$ , \*\*  $p < 0.05$ , \*\*\*  $p < 0.01$ 

Table A35: Quadratic effect of SC share. Dependent variable: RGGVY (if present, RGGVY= 100). The standard errors are clustered by constituency.

**Pooled**

|                             | (1)                | (2)                | (3)                | (4)                | (5)                | (6)                |
|-----------------------------|--------------------|--------------------|--------------------|--------------------|--------------------|--------------------|
| Share SC (%)                | -0.01***<br>(0.00) | -0.01***<br>(0.00) | -0.01***<br>(0.00) | -0.01***<br>(0.00) | -0.01***<br>(0.00) | -0.01***<br>(0.00) |
| Distance (log)              |                    | 0.15***<br>(0.02)  |                    |                    |                    | 0.16***<br>(0.02)  |
| Domestic Electricity (2001) |                    |                    | -0.01***<br>(0.00) |                    |                    | -0.01***<br>(0.00) |
| Population (log)            |                    |                    |                    | -0.30***<br>(0.02) |                    | -0.26***<br>(0.02) |
| Pucca Road                  |                    |                    |                    |                    | -0.30***<br>(0.05) | -0.17***<br>(0.05) |
| Constant                    | -0.59***<br>(0.06) | -0.96***<br>(0.08) | -0.35***<br>(0.06) | 1.43***<br>(0.18)  | -0.40***<br>(0.06) | 1.12***<br>(0.19)  |
| Observations                | 96557              | 90683              | 96557              | 96557              | 96196              | 90454              |
| # Clusters                  | 402                | 401                | 402                | 402                | 402                | 401                |

Standard errors in parentheses

\*  $p < 0.10$ , \*\*  $p < 0.05$ , \*\*\*  $p < 0.01$

Table A36: Logit specification. Dependent variable: RGGVY (if present, RGGVY= 1). Note: fixed effect versions are computationally too intensive, given the large number of parameters. The standard errors are clustered by constituency.

**Pooled**

|                             | (1)               | (2)                | (3)               | (4)               | (5)               | (6)                |
|-----------------------------|-------------------|--------------------|-------------------|-------------------|-------------------|--------------------|
| Share SC [0,1]              | -0.28<br>(0.21)   | -0.26<br>(0.20)    | -0.28<br>(0.21)   | -0.30<br>(0.21)   | -0.33<br>(0.21)   | -0.31<br>(0.20)    |
| Distance (log)              |                   | -0.53***<br>(0.06) |                   |                   |                   | -0.55***<br>(0.06) |
| Domestic Electricity (2001) |                   |                    | 0.00<br>(0.00)    |                   |                   | -0.00<br>(0.00)    |
| Population (log)            |                   |                    |                   | 0.30***<br>(0.05) |                   | 0.26***<br>(0.04)  |
| Pucca Road                  |                   |                    |                   |                   | 0.51***<br>(0.14) | 0.41***<br>(0.13)  |
| Constant                    | 2.58***<br>(0.14) | 3.83***<br>(0.25)  | 2.57***<br>(0.14) | 0.52<br>(0.33)    | 2.26***<br>(0.16) | 1.80***<br>(0.40)  |
| Observations                | 96557             | 90683              | 96557             | 96557             | 96196             | 90454              |
| $R^2$                       | 0.00              | 0.02               | 0.00              | 0.01              | 0.00              | 0.04               |
| # Clusters                  | 402               | 401                | 402               | 402               | 402               | 401                |

Standard errors in parentheses

\*  $p < 0.10$ , \*\*  $p < 0.05$ , \*\*\*  $p < 0.01$ **Constituency fixed effects**

|                             | (1)               | (2)                | (3)               | (4)               | (5)               | (6)                |
|-----------------------------|-------------------|--------------------|-------------------|-------------------|-------------------|--------------------|
| Share SC [0,1]              | 0.02<br>(0.12)    | -0.02<br>(0.13)    | 0.01<br>(0.13)    | 0.01<br>(0.12)    | 0.01<br>(0.13)    | -0.03<br>(0.13)    |
| Distance (log)              |                   | -0.44***<br>(0.05) |                   |                   |                   | -0.43***<br>(0.05) |
| Domestic Electricity (2001) |                   |                    | 0.00***<br>(0.00) |                   |                   | 0.00**<br>(0.00)   |
| Population (log)            |                   |                    |                   | 0.08***<br>(0.02) |                   | 0.08***<br>(0.02)  |
| Pucca Road                  |                   |                    |                   |                   | -0.01<br>(0.04)   | -0.03<br>(0.04)    |
| Constant                    | 2.51***<br>(0.03) | 3.54***<br>(0.11)  | 2.48***<br>(0.03) | 1.94***<br>(0.11) | 2.52***<br>(0.04) | 2.98***<br>(0.14)  |
| Observations                | 96557             | 90683              | 96557             | 96557             | 96196             | 90454              |
| $R^2$                       | 0.00              | 0.03               | 0.00              | 0.00              | 0.00              | 0.03               |
| # Clusters                  | 402               | 401                | 402               | 402               | 402               | 401                |
| Constituency FE             | ✓                 | ✓                  | ✓                 | ✓                 | ✓                 | ✓                  |

Standard errors in parentheses

\*  $p < 0.10$ , \*\*  $p < 0.05$ , \*\*\*  $p < 0.01$ 

Table A37: Effect of SC share on night-time lighting. Dependent variable: average night-time light. Note: the share of SC is rescaled to the [0, 1] interval to make point estimates more readable. The standard errors are clustered by constituency.

**Pooled**

|                             | (1)                | (2)                | (3)                | (4)               | (5)               |
|-----------------------------|--------------------|--------------------|--------------------|-------------------|-------------------|
| Share SC (%)                | 0.11***<br>(0.02)  | 0.10***<br>(0.02)  | 0.10***<br>(0.02)  | 0.10***<br>(0.02) | 0.09***<br>(0.02) |
| Distance (log)              |                    | 2.46***<br>(0.50)  |                    |                   | 2.29***<br>(0.47) |
| Domestic Electricity (2001) |                    |                    | 0.03***<br>(0.01)  |                   | 0.01<br>(0.01)    |
| Population (log)            |                    |                    |                    | 9.72***<br>(0.48) | 9.60***<br>(0.50) |
| Constant                    | 63.78***<br>(1.76) | 57.30***<br>(2.51) | 62.86***<br>(1.79) | -3.22<br>(4.37)   | -8.59*<br>(4.88)  |
| Observations                | 96196              | 90454              | 96196              | 96196             | 90454             |
| $R^2$                       | 0.00               | 0.01               | 0.00               | 0.05              | 0.05              |
| # Clusters                  | 402                | 401                | 402                | 402               | 401               |

Standard errors in parentheses

\*  $p < 0.10$ , \*\*  $p < 0.05$ , \*\*\*  $p < 0.01$ **Constituency fixed effects**

|                             | (1)                | (2)                | (3)                | (4)                | (5)                |
|-----------------------------|--------------------|--------------------|--------------------|--------------------|--------------------|
| Share SC (%)                | 0.06***<br>(0.01)  | 0.06***<br>(0.01)  | 0.06***<br>(0.01)  | 0.06***<br>(0.01)  | 0.05***<br>(0.01)  |
| Distance (log)              |                    | 0.46**<br>(0.23)   |                    |                    | 0.62***<br>(0.22)  |
| Domestic Electricity (2001) |                    |                    | 0.03***<br>(0.00)  |                    | 0.01***<br>(0.00)  |
| Population (log)            |                    |                    |                    | 7.59***<br>(0.25)  | 7.48***<br>(0.25)  |
| Constant                    | 64.77***<br>(0.23) | 63.09***<br>(0.58) | 63.92***<br>(0.27) | 12.49***<br>(1.74) | 10.96***<br>(1.89) |
| Observations                | 96196              | 90454              | 96196              | 96196              | 90454              |
| $R^2$                       | 0.00               | 0.00               | 0.00               | 0.04               | 0.04               |
| # Clusters                  | 402                | 401                | 402                | 402                | 401                |
| Constituency FE             | ✓                  | ✓                  | ✓                  | ✓                  | ✓                  |

Standard errors in parentheses

\*  $p < 0.10$ , \*\*  $p < 0.05$ , \*\*\*  $p < 0.01$ 

Table A38: Dependent variable: pucca road (if present, pucca= 100). The standard errors are clustered by constituency.

**Pooled**

|                             | (1)                | (2)                | (3)                | (4)                | (5)                | (6)                |
|-----------------------------|--------------------|--------------------|--------------------|--------------------|--------------------|--------------------|
| Share SC (%)                | -0.18***<br>(0.04) | -0.17***<br>(0.04) | -0.16***<br>(0.04) | -0.17***<br>(0.04) | -0.17***<br>(0.04) | -0.15***<br>(0.04) |
| Distance (log)              |                    | 3.15***<br>(0.82)  |                    |                    |                    | 3.26***<br>(0.77)  |
| Domestic Electricity (2001) |                    |                    | -0.16***<br>(0.02) |                    |                    | -0.14***<br>(0.02) |
| Population (log)            |                    |                    |                    | -6.53***<br>(0.93) |                    | -5.67***<br>(0.92) |
| Pucca Road                  |                    |                    |                    |                    | -6.48***<br>(2.00) | -3.59*<br>(1.92)   |
| Constant                    | 35.43***<br>(2.70) | 27.86***<br>(2.72) | 40.64***<br>(2.95) | 80.42***<br>(7.36) | 39.60***<br>(2.54) | 73.64***<br>(7.91) |
| Observations                | 96557              | 90683              | 96557              | 96557              | 96196              | 90454              |
| $R^2$                       | 0.01               | 0.01               | 0.03               | 0.03               | 0.01               | 0.06               |
| # Clusters                  | 70                 | 70                 | 70                 | 70                 | 70                 | 70                 |

Standard errors in parentheses

\*  $p < 0.10$ , \*\*  $p < 0.05$ , \*\*\*  $p < 0.01$ **Constituency fixed effects**

|                             | (1)                | (2)                | (3)                | (4)                | (5)                | (6)                |
|-----------------------------|--------------------|--------------------|--------------------|--------------------|--------------------|--------------------|
| Share SC (%)                | -0.21***<br>(0.02) | -0.21***<br>(0.02) | -0.20***<br>(0.02) | -0.20***<br>(0.02) | -0.21***<br>(0.02) | -0.19***<br>(0.02) |
| Distance (log)              |                    | 1.35***<br>(0.26)  |                    |                    |                    | 1.10***<br>(0.24)  |
| Domestic Electricity (2001) |                    |                    | -0.15***<br>(0.02) |                    |                    | -0.13***<br>(0.01) |
| Population (log)            |                    |                    |                    | -6.64***<br>(0.78) |                    | -5.93***<br>(0.73) |
| Pucca Road                  |                    |                    |                    |                    | -5.44***<br>(0.72) | -2.34***<br>(0.55) |
| Observations                | 96557              | 90683              | 96557              | 96557              | 96196              | 90454              |
| $R^2$                       | 0.21               | 0.21               | 0.23               | 0.23               | 0.21               | 0.25               |
| # Clusters                  | 70                 | 70                 | 70                 | 70                 | 70                 | 70                 |
| Constituency FE             | ✓                  | ✓                  | ✓                  | ✓                  | ✓                  | ✓                  |

Standard errors in parentheses

\*  $p < 0.10$ , \*\*  $p < 0.05$ , \*\*\*  $p < 0.01$ 

Table A39: Dependent variable: RGGVY (if present, RGGVY= 100). The standard errors are clustered by district.

|                  | Unelectrified in 2001 |                    |                    |                    |                    | Electrified in 2001 |                    |                    |                    |                    |
|------------------|-----------------------|--------------------|--------------------|--------------------|--------------------|---------------------|--------------------|--------------------|--------------------|--------------------|
|                  | (1)                   | (2)                | (3)                | (4)                | (5)                | (6)                 | (7)                | (8)                | (9)                | (10)               |
| Share SC (%)     | -0.20***<br>(0.02)    | -0.20***<br>(0.02) | -0.19***<br>(0.02) | -0.20***<br>(0.02) | -0.19***<br>(0.02) | -0.17***<br>(0.02)  | -0.17***<br>(0.02) | -0.17***<br>(0.02) | -0.17***<br>(0.02) | -0.17***<br>(0.02) |
| Distance (log)   |                       | 1.49***<br>(0.31)  |                    |                    | 1.34***<br>(0.30)  |                     | 0.54***<br>(0.19)  |                    |                    | 0.52***<br>(0.18)  |
| Population (log) |                       |                    | -6.08***<br>(0.76) |                    | -5.86***<br>(0.78) |                     |                    | -4.73***<br>(0.69) |                    | -4.65***<br>(0.68) |
| Pucca Road       |                       |                    |                    | -6.11***<br>(0.73) | -3.18***<br>(0.61) |                     |                    |                    | -1.67***<br>(0.69) | -0.13<br>(0.62)    |
| Observations     | 61950                 | 58245              | 61950              | 61724              | 58104              | 34605               | 32435              | 34605              | 34471              | 32348              |
| $R^2$            | 0.23                  | 0.23               | 0.25               | 0.23               | 0.25               | 0.23                | 0.23               | 0.24               | 0.23               | 0.25               |
| # Clusters       | 70                    | 70                 | 70                 | 70                 | 70                 | 70                  | 70                 | 70                 | 70                 | 70                 |
| Constituency FE  | ✓                     | ✓                  | ✓                  | ✓                  | ✓                  | ✓                   | ✓                  | ✓                  | ✓                  | ✓                  |

Standard errors in parentheses

\*  $p < 0.10$ , \*\*  $p < 0.05$ , \*\*\*  $p < 0.01$

Table A40: Dependent variable: RGGVY (if present, RGGVY= 100). All models estimated with constituency fixed effects. The standard errors are clustered by district.

**Pooled**

|                             | (1)                | (2)                | (3)                | (4)                | (5)                | (6)                |
|-----------------------------|--------------------|--------------------|--------------------|--------------------|--------------------|--------------------|
| Share SC (%)                | -0.09***<br>(0.02) | -0.09***<br>(0.02) | -0.09***<br>(0.02) | -0.09***<br>(0.02) | -0.09***<br>(0.02) | -0.09***<br>(0.02) |
| Distance (log)              |                    | -2.13***<br>(0.34) |                    |                    |                    | -2.15***<br>(0.33) |
| Domestic Electricity (2001) |                    |                    | 0.00<br>(0.01)     |                    |                    | 0.00<br>(0.01)     |
| Population (log)            |                    |                    |                    | -0.73<br>(0.47)    |                    | -0.96*<br>(0.49)   |
| Pucca Road                  |                    |                    |                    |                    | 0.86<br>(1.42)     | 1.44<br>(1.51)     |
| Constant                    | 25.57***<br>(1.46) | 30.66***<br>(1.73) | 25.53***<br>(1.53) | 30.59***<br>(2.83) | 25.05***<br>(1.66) | 36.30***<br>(3.13) |
| Observations                | 96557              | 90683              | 96557              | 96557              | 96196              | 90454              |
| $R^2$                       | 0.01               | 0.02               | 0.01               | 0.01               | 0.01               | 0.02               |
| # Clusters                  | 70                 | 70                 | 70                 | 70                 | 70                 | 70                 |

Standard errors in parentheses

\*  $p < 0.10$ , \*\*  $p < 0.05$ , \*\*\*  $p < 0.01$ **Constituency fixed effects**

|                             | (1)                | (2)                | (3)                | (4)                | (5)                | (6)                |
|-----------------------------|--------------------|--------------------|--------------------|--------------------|--------------------|--------------------|
| Share SC (%)                | -0.08***<br>(0.01) | -0.09***<br>(0.01) | -0.08***<br>(0.01) | -0.08***<br>(0.01) | -0.08***<br>(0.01) | -0.09***<br>(0.01) |
| Distance (log)              |                    | -1.52***<br>(0.14) |                    |                    |                    | -1.54***<br>(0.14) |
| Domestic Electricity (2001) |                    |                    | 0.01**<br>(0.00)   |                    |                    | 0.01**<br>(0.00)   |
| Population (log)            |                    |                    |                    | -0.77***<br>(0.24) |                    | -0.97***<br>(0.25) |
| Pucca Road                  |                    |                    |                    |                    | 0.74***<br>(0.22)  | 1.16***<br>(0.22)  |
| Observations                | 96557              | 90683              | 96557              | 96557              | 96196              | 90454              |
| $R^2$                       | 0.30               | 0.29               | 0.30               | 0.30               | 0.30               | 0.30               |
| # Clusters                  | 70                 | 70                 | 70                 | 70                 | 70                 | 70                 |
| Constituency FE             | ✓                  | ✓                  | ✓                  | ✓                  | ✓                  | ✓                  |

Standard errors in parentheses

\*  $p < 0.10$ , \*\*  $p < 0.05$ , \*\*\*  $p < 0.01$ 

Table A41: Dependent variable: household electrification in 2011 (0-100 percent). The standard errors are clustered by district.



**Spatial Autoregressive Models (Part I)**

| <b>District</b>     | <b>Point estimate (Share SC)</b> | <b>Standard error</b> | <b>t-value</b> |
|---------------------|----------------------------------|-----------------------|----------------|
| Agra                | -0.37                            | 0.06                  | -6.44          |
| Aligarh             | -0.41                            | 0.06                  | -6.29          |
| Allahabad           | -0.27                            | 0.05                  | -5.69          |
| Ambedkar Nagar      | -0.07                            | 0.03                  | -2.21          |
| Auraiya             | -0.32                            | 0.08                  | -4.05          |
| Azamgarh            | -0.24                            | 0.03                  | -7.32          |
| Baghpat             | -                                | -                     | -              |
| Bahraich            | -0.15                            | 0.10                  | -1.50          |
| Ballia              | -0.22                            | 0.05                  | -4.23          |
| Balrampur           | -0.23                            | 0.08                  | -3.00          |
| Banda               | -0.50                            | 0.12                  | -4.31          |
| Barabanki           | -0.17                            | 0.06                  | -2.83          |
| Bareilly            | -0.37                            | 0.05                  | -7.50          |
| Basti               | -0.16                            | 0.05                  | -3.38          |
| Bijnor              | -0.21                            | 0.03                  | -7.63          |
| Budaun              | -0.47                            | 0.04                  | -10.87         |
| Bulandshahar        | -0.25                            | 0.06                  | -4.32          |
| Chandauli           | -0.01                            | 0.05                  | -0.12          |
| Chitrakoot          | -0.36                            | 0.09                  | -3.97          |
| Deoria              | -0.15                            | 0.04                  | -3.56          |
| Etah                | -0.81                            | 0.06                  | -13.75         |
| Etawah              | -0.42                            | 0.08                  | -4.93          |
| Faizabad            | -0.33                            | 0.08                  | -4.15          |
| Farrukhabad         | -0.42                            | 0.09                  | -4.82          |
| Fatehpur            | -0.18                            | 0.08                  | -2.15          |
| Firozabad           | -0.63                            | 0.07                  | -8.73          |
| Gautam Buddha Nagar | -0.28                            | 0.12                  | -2.29          |
| Ghaziabad           | 0.07                             | 0.05                  | 1.45           |
| Ghazipur            | -0.08                            | 0.02                  | -3.92          |
| Gonda               | -0.55                            | 0.08                  | -6.49          |
| Gorakhpur           | -0.17                            | 0.03                  | -5.45          |
| Hamirpur            | -0.61                            | 0.16                  | -3.69          |
| Hardoi              | -0.23                            | 0.05                  | -4.43          |
| Hathras             | -0.29                            | 0.07                  | -4.44          |

Table A42: Estimates from a spatial autoregressive model (part I). Estimates computed state-by-state due to the size of the spatial correlation matrix. Models could not converge in a few cases.

**Spatial Autoregressive Models (Part II)**

| <b>District</b>     | <b>Point estimate (Share SC)</b> | <b>Standard error</b> | <b>t-value</b> |
|---------------------|----------------------------------|-----------------------|----------------|
| Jalaun              | -0.21                            | 0.06                  | -3.39          |
| Jaunpur             | -0.12                            | 0.03                  | -3.93          |
| Jhansi              | -0.33                            | 0.11                  | -2.95          |
| Jyotiba Phule Nagar | -0.29                            | 0.08                  | -3.75          |
| Kannauj             | -0.41                            | 0.10                  | -4.08          |
| Kanpur Dehat        | -0.35                            | 0.09                  | -4.12          |
| Kanpur Nagar        | -0.18                            | 0.07                  | -2.71          |
| Kaushambi           | -0.37                            | 0.09                  | -3.97          |
| Kheri               | -0.03                            | 0.05                  | -0.71          |
| Kushinagar          | -0.23                            | 0.08                  | -2.95          |
| Lalitpur            | -0.23                            | 0.12                  | -1.87          |
| Lucknow             | 0.05                             | 0.04                  | 1.12           |
| Mahoba              | -0.21                            | 0.15                  | -1.38          |
| Mahrajganj          | -0.23                            | 0.10                  | -2.38          |
| Mainpuri            | -0.42                            | 0.09                  | -4.49          |
| Mathura             | -0.04                            | 0.05                  | -0.82          |
| Mau                 | -0.11                            | 0.05                  | -2.29          |
| Meerut              | -                                | -                     | -              |
| Mirzapur            | 0.00                             | 0.05                  | 0.02           |
| Moradabad           | -0.26                            | 0.04                  | -6.35          |
| Muzaffarnagar       | -                                | -                     | -              |
| Pilibhit            | -0.24                            | 0.07                  | -3.56          |
| Pratapgarh          | -0.17                            | 0.06                  | -2.92          |
| Rae Bareli          | -0.06                            | 0.04                  | -1.63          |
| Rampur              | -0.23                            | 0.07                  | -3.51          |
| Saharanpur          | -                                | -                     | -              |
| Sant Kabir Nagar    | -0.16                            | 0.06                  | -2.72          |
| Sant Ravidas Nagar  | -0.03                            | 0.05                  | -0.74          |
| Shahjahanpur        | -0.34                            | 0.04                  | -8.73          |
| Shrawasti           | -0.51                            | 0.13                  | -4.03          |
| Siddharthnagar      | -0.34                            | 0.06                  | -5.50          |
| Sitapur             | -0.21                            | 0.05                  | -4.12          |
| Sonbhadra           | -0.31                            | 0.05                  | -6.89          |
| Sultanpur           | -0.09                            | 0.05                  | -1.65          |
| Unnao               | -0.18                            | 0.06                  | -3.02          |
| Varanasi            | -                                | -                     | -              |

Table A43: Estimates from a spatial autoregressive model (part II). Estimates computed state-by-state due to the size of the spatial correlation matrix. Models could not converge in a few cases.

## A10 ACCESS Survey

### A10.1 Summary Statistics

- Table A44 provides the summary statistics for the ACCESS data used in the analysis.
- Table A45 reports the estimates of SC status on knowledge about RGGVY and household electrification.

|                    | Mean | S.D. | Min. | Max. | Obs. |
|--------------------|------|------|------|------|------|
| Heard of RGGVY     | 0.24 | 0.43 | 0    | 1    | 3023 |
| Electrified (Grid) | 0.57 | 0.49 | 0    | 1    | 3023 |
| SC/ST              | 0.22 | 0.41 | 0    | 1    | 3023 |

Table A44: Summary statistics for ACCESS data used in the analysis.

### A10.2 Evidence from Household Surveys

This section looks below the village level at the experiences of Dalit and non-Dalit households in Uttar Pradesh. We examine whether our community-level findings hold when we focus on individual households.

Collected between November 2014 and May 2015, the ACCESS survey data includes information from a representative sample of 252 villages from 21 districts (Aklin et al., 2016). The survey is useful because it contains questions about grid electrification status, awareness about RGGVY (i.e., whether the household head has heard of the scheme), and whether the household is Dalit or non-Dalit.

Table A45 uses the ACCESS survey to examine grid electricity connections, RGGVY awareness, and SC status. Models 1 and 4 are linear; models 2 and 4 are logistic regressions; models 3 and 6 are logistic regressions with conditional fixed effects. Standard errors are adjusted for sampling by village. As the table shows, SC households perform systematically worse than non-SC households. In model 1, we see that Dalit households are 4 percentage points less likely to have heard from the RGGVY, suggesting that RGGVY implementation is concentrated outside villages and habitations populated by Dalits. In model 4, we see that Dalit households are 15 percentage points less likely

|          | Heard of RGGVY    |                   |                   | Electrified (Grid) |                    |                    |
|----------|-------------------|-------------------|-------------------|--------------------|--------------------|--------------------|
|          | OLS               | Logit             | FE Logit          | OLS                | Logit              | FE Logit           |
| SC       | -0.04**<br>(0.02) | -0.25**<br>(0.12) | -0.29**<br>(0.14) | -0.15***<br>(0.02) | -0.60***<br>(0.09) | -0.76***<br>(0.11) |
| <i>N</i> | 3023              | 3023              | 2255              | 3023               | 3023               | 2711               |
| Villages | 252               | 252               | 188               | 252                | 252                | 226                |

Standard errors in parentheses

\*  $p < 0.10$ , \*\*  $p < 0.05$ , \*\*\*  $p < 0.01$

Table A45: SC households, awareness of RGGVY (models 1-2), and household grid electricity. Models 2 and 4 are logistic regressions with sampling weights; models 3 and 6 are logistic regressions with conditional fixed effects at the village level. Standard errors are adjusted for sampling by village.

to have grid electricity connections, again consistent with the notion that the lack of RGGVY implementation is hurting Dalit households. Indeed, because this pattern is robust at the household level, the unequal pattern cannot be attributed to ecological inference problems.

## Supplementary Appendix: References

- Aklin, Michaël, Chao-yo Cheng, Johannes Urpelainen, Karthik Ganesan, and Abhishek Jain. 2016. “Factors Affecting Household Satisfaction with Electricity Supply in Rural India.” *Nature Energy* 1 (16170).
- Angrist, Joshua D., and Jörn-Steffen Pischke. 2009. *Mostly Harmless Econometrics: An Empiricist’s Companion*. Princeton: Princeton University Press.
- Imbens, Guido W., and Thomas Lemieux. 2008. “Regression Discontinuity Designs: A Guide to Practice.” *Journal of Econometrics* 142 (2): 615-635.
- McCrary, Justin. 2008. “Manipulation of the Running Variable in the Regression Discontinuity Design: A Density Test.” *Journal of Econometrics* 142 (2): 698-714.
